1           **Assembly status transition offers an avenue for allosteric activity**  
2                           **modulation of a supramolecular enzyme**

3  
4           Yao Chen<sup>a\*</sup>, Weiya Xu<sup>a\*</sup>, Shuwei Yu<sup>b\*</sup>, Kang Ni<sup>c</sup>, Guangbiao, She<sup>b</sup>, Xiaodong Yec,  
5                           Qiong Xing<sup>d#</sup>, Jian Zhao<sup>b#</sup>, Chengdong Huang<sup>a#</sup>

6  
7   \*These authors contributed equally

8   # Corresponding author: Qiong Xing (qiongxingnmr@hubu.edu.cn); Jian Zhao  
9 (jzhao2@qq.com); Chengdong Huang (huangcd@ustc.edu.cn)

10 Affiliations:

11 **a:** *Ministry of Education Key Laboratory for Membrane-less Organelles & Cellular Dynamics,*  
12 *Hefei National Laboratory for Physical Sciences at the Microscale, School of Life Sciences,*  
13 *Division of Life Sciences and Medicine, University of Science and Technology of China,*  
14 *230027 Hefei, P.R. China*

15 **b:** *State Key Laboratory of Tea Plant Biology and Utilization, College of Tea and Food*  
16 *Science and Technology, Anhui Agricultural University, Hefei, 230036, China.*

17 **c:** *Hefei National Laboratory for Physical Sciences at the Microscale, Department of*  
18 *Chemical Physics, University of Science and Technology of China, Hefei, Anhui 230026,*  
19 *China*

20 **d:** *State Key Laboratory of Biocatalysis and Enzyme Engineering, Hubei Collaborative*  
21 *Innovation Center for Green Transformation of Bio-Resources, Hubei Key Laboratory of*  
22 *Industrial Biotechnology, School of Life Sciences, Hubei University, Wuhan, China.*

23

24

25

26

27

28

29

30

31 **Abstract**

32 Nature has evolved many supramolecular proteins assembled in certain, sometimes  
33 even seemingly oversophisticated, morphological manners. The rationale behind such  
34 evolutionary efforts is often poorly understood. Here we provide atomic-resolution  
35 insights into how the dynamic building of a structurally complex enzyme with higher-  
36 order symmetry offers amenability to intricate allosteric regulation. We have established  
37 the functional coupling between enzymatic activity and protein morphological states of  
38 glutamine synthetase (GS), an old multi-subunit enzyme essential for cellular nitrogen  
39 metabolism. Cryo-EM structure determination of GS in both the catalytically active and  
40 inactive assembly states allows us to reveal an unanticipated self-assembly-induced  
41 dynamics-driven allosteric paradigm, in which the remote interactions between two  
42 subcomplex entities significantly rigidify the otherwise structurally fluctuating active sites,  
43 thereby regulating activity. We further show *in vivo* evidences that how the enzyme  
44 morphology transitions could be modulated by cellular factors on demand. Collectively,  
45 our data present an example of how assembly status transition offers an avenue for  
46 allosteric modulation, and sharpens our mechanistic understanding of allostery,  
47 dynamics, cooperativity, and other complex functional and regulatory properties of  
48 supramolecular enzymes.

49

50

51

52

53

## 54 **Introduction**

55 Recent studies have evidenced that only a small portion of proteins function in isolation  
56 in cells whereas the majority is assembled into complexes through protein-protein  
57 interactions with identical or different protein subunit(s) <sup>1</sup>. The rationale behind such an  
58 evolutionary selection has been the subject of considerable speculation; proposals for  
59 the advantages associated with a multimeric-units complex instead of a long single  
60 polypeptide chain include better error control in synthesis, greater coding and folding  
61 efficiency, and possibility of allosteric regulation <sup>2</sup>. Morphologically speaking, many  
62 protein complexes especially homomeric ones adopt a symmetric spatial arrangement,  
63 either cyclic ( $C_n$  ( $n>1$ )) or dihedral ( $D_n$  ( $n>1$ )) symmetry, characterized by a rotational  
64 symmetry or two orthogonal symmetry axes, respectively. In contrast to the cyclic  
65 complexes which evolve in one step (e.g.  $C1 \rightarrow C5$ ), evolution of dihedral complexes  
66 takes place in multiple steps (e.g.  $C1 \rightarrow C5 \rightarrow D5$ ) <sup>3</sup>, and adds another layer of structural  
67 complexity. Intriguingly, pioneering studies have revealed many supramolecular  
68 enzymes organized in dihedral symmetry, with subcomplex entities in cyclic symmetry  
69 holding, at least outwardly, multiple integral active sites. Thus a fundamental question  
70 arises here is that why nature builds these protein complexes with a seemingly  
71 oversophisticated quaternary design, if the subcomplexes alone possess complete  
72 elements for action? In other words, is the extra assembly step, e.g.  $C5 \rightarrow D5$ , is a futile  
73 evolutionary effort for these supramolecular protein complexes?

74 One such an example is glutamine synthetases (GSs) (EC 6.3.1.2), one of the most  
75 ancient functioning enzymes in existence and a central enzyme in nitrogen metabolism  
76 of all living organisms, catalyzing the formation of glutamine by condensation of  
77 glutamate with ammonia using ATP as an energy source <sup>4,5</sup>. Three classes of GS  
78 enzymes have been identified in different organisms, namely, GSI, GSII and GSIII.  
79 Decades of studies have established a striking notion that all three classes of GS  
80 enzymes, despite of dramatic differences in amino acid sequences and protein sizes,  
81 share quaternary geometry in dihedral symmetry assembled with two oligomeric rings <sup>6-</sup>  
82 <sup>13</sup>. Considering that the active sites of GS are located at the clefts formed between two  
83 neighboring protomers within the same ring and distal to the ring-ring interface, each  
84 isolated GS subcomplex ring holds multiple integral catalytic sites <sup>4,14</sup>. The functional  
85 demand for this evolutionary conservation, the quaternary organization of GS with  
86 dihedral symmetry, remains elusive.

87 Here we sought out to explore the functional link between the oligomeric conformation  
88 and catalysis activity, and mechanistically justify the seemingly oversophisticated  
89 assembly design in this supramolecular enzyme. Our results unveil a previously  
90 uncharacterized dynamics-driven allostery mechanism induced by assembly status  
91 transition of GS, and present an example that how a particular quaternary geometry  
92 selectively defines the oligomer dynamics congruent with required allosteric activities.  
93 We further show *in vivo* evidence how this regulatory machinery is elegantly utilized by  
94 the cell to meet the ever-changing metabolic needs. The functional implications of these  
95 findings are discussed.

96 **Results**

97 **Two highly conserved GSIIIs demonstrate distinct quaternary structure**  
98 **organization propensities**

99 With the aim of clarifying the functional role of dihedral symmetry in GS functions, we  
100 first carried out a quest for GSs that share a high degree of sequence conservation, but  
101 demonstrate distinct quaternary structural assembly properties. We make use of the  
102 weak ring-ring interaction of GSII, a prominent structural difference between the type I  
103 and type II GSs<sup>11-13</sup>, and seek GSII variants from different species with amino acid  
104 variations mainly occurring at the pentamer interface, which may thus present disparate  
105 decamer-forming propensities. We built model structures for the candidate GSIIIs based  
106 on the crystal structure of the maize GSII (pdb code:2D3B) and analyzed the amino acid  
107 variations in the context of model structures. Primary structure analysis reveals GSIIIs  
108 from the plants of *Camellia sinensis* (CsGSIIb) and *Glycine max* (GmGS $\beta$ 2) share an  
109 overall very high sequence homology (~90% identical and ~97% conserved) and  
110 absolutely conserved substrate-binding and catalytic sites (Fig. 1a), with, however, a  
111 significant portion of amino acid variations clustered at the interface between two  
112 pentamer rings (Fig. 1a and 1b). We then recombinantly expressed both CsGSIIb and  
113 GmGS $\beta$ 2 in *E. coli* and purified these two GSII homologs. To assess the oligomerization  
114 status, we performed size-exclusion chromatography (SEC) coupled to both multi-angle  
115 light scattering (MALS) and quasi-elastic light scattering (QELS). Despite sharing an  
116 overall highly conserved amino acid sequence, CsGSIIb and GmGS $\beta$ 2 exhibit distinct  
117 quaternary structural properties. MALS analysis shows the GSII from *Glycine max* being  
118 largely a homogeneous decamer in solution (Fig. 1c). In contrast, under the same  
119 condition the majority fraction (~82%) of CsGSIIb adopts a pentameric configuration,

120 along with a minor fraction (~18%) being decameric (Fig. 1d). We further show that  
121 CsGSIIb exists in pentamer-decamer dynamic equilibrium in solution and a mixture of  
122 electrostatic and hydrophobic interactions is responsible for attaching of two pentameric  
123 rings; whereas substrates or ligands show no appreciable effect on the decamer-  
124 forming properties (see Supplementary data for details).

125 We further employed negative-stain electron microscopy (EM) to directly visualize the  
126 distinct ring-ring packing propensities for CsGSIIb and GmGS $\beta$ 2. Two-dimensional (2D)  
127 class averages revealed that GmGS $\beta$ 2 forms homogeneous, double stacked-ring  
128 shaped particles (Fig. 1e), in line with the decameric organization pattern previously  
129 reported for other GSII species<sup>11-13</sup>. In contrast, CsGSIIb adopted a mixture of two  
130 quaternary structural modes: detached pentamers (Fig. 1f) and decamers composed of  
131 two stacked pentamer rings (Fig. 1g), consistent with the above MALS analysis result  
132 (Fig. 1d).

133 Analytical ultracentrifugation (AUC) was carried out to quantitatively assess the  
134 thermodynamic parameters of CsGSIIb pentamer-decamer transition, which  
135 demonstrated two species for CsGSIIb in solution with molecular weights of 191 kDa  
136 and 395 kDa (Fig. 2a), corresponding to the pentameric and decameric configurations,  
137 respectively. Sedimentation profiles at various protein concentrations were analyzed  
138 and a global analysis of the data at each protein concentration yielded a pentamer-  
139 pentamer dissociation constant ( $K_d$ ) of  $0.27 \pm 0.06$   $\mu$ M at room temperature. It is  
140 noteworthy that the dissociation constant within the sub-micromolar range allows  
141 CsGSIIb to predominantly exist as isolated pentamers under the concentration assayed

142 for enzymatic activities, laying a solid foundation for probing the functional role of the  
143 decamer formation in modulating the enzyme activity of GS.

#### 144 **GSIIIs in different assembly states demonstrate distinct enzymatic activities**

145 We next sought to compare the glutamine synthesis activity of these two highly  
146 conserved GSIIIs. As shown in Fig. 3b and Fig. S2a, when supplied with ammonium  
147 chloride, the stable decamer-adopting GmGS $\beta$ 2 demonstrated significant GS activities.  
148 Further steady-state kinetic measurements yielded turnover numbers ( $k_{cat}$ ) and  
149 Michaelis constants ( $K_m$ ) of  $\sim 12.8 \text{ min}^{-1}$  and  $\sim 44 \text{ }\mu\text{M}$ , respectively (Fig. 3c). In sharp  
150 contrast, CsGSIIb, for which the majority protein exists as discrete pentamers under the  
151 condition assayed, only demonstrated basal activity (Fig. 3b and Fig. S3a), consistent  
152 with previous observations that the isolated single-ringed GSII species is nonfunctional  
153 <sup>15,16</sup>. These observations raised the question as to whether the drastic disparity in  
154 catalytic activities for these two highly conserved GSII could be attributed to their  
155 dramatically different propensities for formation of a double-ringed architecture. If the  
156 above proposal holds true, a positive concentration-dependent cooperation of enzyme  
157 activity would be expected as increase in the concentration of CsGSIIb favors decamer  
158 assembly (Fig. S1a). Indeed, five times increase in the concentration of CsGSIIb  
159 assayed (from 1  $\mu\text{M}$  to 5  $\mu\text{M}$ ) resulted in  $\sim 30$  folds increase in activity, i.e.  $\sim 6$  folds  
160 activity increase per unit of enzyme, displaying a significant concentration-dependent  
161 simulation effect (Fig. S2b).

#### 162 **Catalytic switching of CsGSIIb through oligomeric states interconversion**

163 To further validate the above proposal, we performed mutagenesis to CsGSIIb, aiming  
164 to convert its unstable pentamer-decamer equilibrium state to a stable decamer and

165 then evaluate the impact on catalytic activity. According to the amino acid sequence of  
166 GmGS $\beta$ 2, three CsGS1b mutants, i.e. EVK138DIQ, I143L and Y150F, respectively,  
167 were selected, expressed and subsequently purified as the wild type (WT) protein. We  
168 then performed SEC-MALS measurements to evaluate mutational effects on their  
169 oligomeric states. As shown in Fig. 2dx and 2f, both mutations of I143L and  
170 EVK138DIQ led to a drastic shift in the oligomerization equilibrium towards decamer  
171 assembly, causing significant increase in the distribution of decameric state from ~18%  
172 in the WT-CsGS1b (Fig. 1d) to >95% and ~72%, respectively. These observations  
173 confirmed that both mutations introduced at the interface, albeit largely conservative,  
174 dramatically fortified the decamer edifice assembly. In contrast, substitution of the  
175 tyrosine at the residue 150 with a phenylalanine showed no appreciable change in its  
176 quaternary organization mode (Fig. S3a), suggesting no critical role for the residue  
177 Y150 in maintaining two CsGS1b pentameric ring subcomplexes attached. We  
178 employed AUC analysis to measure the ring-ring dissociation constant for mutants of  
179 I143L and EVK138DIQ. As demonstrated in Fig. 2e and 2f, replacement of I143 or EVK  
180 at residues 138-140 with leucine or DIQ yielded ring-ring disassociation constants of  
181 ~0.01 or ~0.04  $\mu$ M, respectively, i.e., ~27 or ~7 folds of increase in the ring-ring binding  
182 affinity compared with that of WT-CsGS1b. The Gibbs energy changes upon mutation  
183 ( $\Delta\Delta G$ ) for I143L and EVK138DIQ were calculated to be -8.1 kJ/mol and -4.7 kJ/mol,  
184 respectively.

185 We next set out to investigate the resulting impacts on their enzymatic activities. As  
186 shown in Fig. 2h-2j, both mutations of I143L and EVK138DIQ caused dramatic increase  
187 in catalytic activity of ~76 and ~64 folds, respectively. As all mutated amino acids are



188 distal to either the catalytic site or substrate binding regions with distances  $>20$  Å and  
189 hence are unlikely to be directly involved in catalytic reaction, we infer that the  
190 stimulations of the enzymatic activity of CsGSIIb upon residue perturbations are  
191 attributed to allosteric effects induced by remote contacts between two pentamer rings.  
192 As expected, the mutation of Y150F, which did not alter pentamer-decamer equilibrium  
193 of CsGSIIb (Fig. S3a), showed no noticeable change in enzymatic activity (Fig. S3b).

#### 194 **Structural basis for dynamics-driven allostery of GSII**

195 To elucidate the allosteric mechanism of how the interactions between two GSII  
196 pentameric rings remotely trigger enzymatic activity, we next employed single-particle  
197 cryo-EM imaging technique and first determined the structures of GmGSβ2 decamer, as  
198 well as that of the CsGSIIb that adopts decameric configuration (thereafter named as  
199 CsGSIIb<sup>Dec</sup>). 3D classifications of 104717 and 43876 particles for GmGSβ2 and  
200 CsGSIIb<sup>Dec</sup>, respectively, revealed that both molecules were arranged in D5 symmetry  
201 with two pentameric rings stacked in a head-to-head manner (Fig. 3a and 3b), a  
202 strikingly conserved structural feature that have been widely observed for other type II  
203 GS species<sup>11-13</sup>. Refinement of the GmGSβ2 and CsGSIIb<sup>Dec</sup> structures yielded maps  
204 with an average resolution of 2.9 Å and 3.3 Å, respectively, with literally identical  
205 dimensions of 115 Å x 115 Å x 95 Å. As expected from the very high conservation in  
206 amino acid sequence (Fig. 1a), decamer structures of GmGSβ2 and CsGSIIb<sup>Dec</sup> are very  
207 similar to each other, as well as to that of the GSII of maize (pdb accession number  
208 2D3A), as highlighted by the root-mean-square deviation (r.m.s.d.) of 0.66–0.80 Å for  
209 328-352 aligned C<sub>α</sub> atoms. Structural alignments reveal that the active sites in GmGSβ2  
210 and CsGSIIb<sup>Dec</sup>, as well as that in the maize GSII, are highly conserved (Fig. 3c),

211 suggesting the catalysis mechanism of these three enzymes, once decamers are  
212 formed, are essentially identical. The overall buried inter-ring surfaces for both GmGS $\beta$ 2  
213 and CsGSIb<sup>Dec</sup> amount to  $\sim 2000 \text{ \AA}^2$ , i.e. approximately only  $400 \text{ \AA}^2$  per individual  
214 monomer–monomer interaction. This highlights the weakness of the inter-ring contacts,  
215 characteristic of type II GS. Indeed, in both structures the inter-ring contacts are  
216 established by only a limited number of hydrophobic and polar interactions provided by  
217 the residues 136-141 and 146-152 segments of each of the intervening subunits (Fig.  
218 S7), which behave as two gear teeth (thereafter named as tooth-1 and tooth-2,  
219 respectively) interlocking the two pentameric rings (Fig. 3d-f). This observation is in line  
220 with the above result that mutations to tooth-1 resulted in drastic change in oligomeric  
221 states behavior (Fig. 2d-2g), and the mixed nature of the inter-ring interactions is  
222 consistent with the MALS analysis result of CsGSIb under various buffer conditions (Fig.  
223 S1b). Intriguingly, the local structure of the teeth regions that mediate inter-ring  
224 interactions remains largely the same in GmGS $\beta$ 2 and CsGSIb<sup>Dec</sup> (Fig. 3d-3e),  
225 suggesting the dramatically different propensities of GmGS $\beta$ 2 and CsGSIb for decamer  
226 formation are due to the nature of the amino acids involved in inter-ring contacts, rather  
227 than the structure. Although the residue of I143 is not directly involved in inter-ring  
228 contact, we argue that its replacement with leucine may stabilize the conformation of  
229 tooth-1 via its interaction with the residue of L134, thus playing an important role in  
230 stabilizing decamer architecture (Fig. 2d and 2e).

231 In order to elucidate the mechanism of how the pentameric CsGSIb (thereafter named  
232 as CsGSIb<sup>Pen</sup>) demonstrates distinct enzymatic properties than CsGSIb<sup>Dec</sup> (Fig. 2h), we  
233 next determined the structure of CsGSIb<sup>Pen</sup>. Lowering the sample concentration, which

234 favored pentamer dissociation (Fig. S1a), allowed us to obtain sufficient number of  
235 CsGSIb<sup>Pen</sup> particles, which, in turn, enabled us to solve the cryo-EM structure of the  
236 inactive single-ringed GSII for the first time. Interestingly, we observed additional class  
237 averages in which the two masses of density attributed to the pentameric rings are no  
238 longer parallel (Fig. S8). These non-parallel ring particles may reflect intermediate  
239 assembly stages in the formation/disruption of the enzyme decamer, again confirming  
240 the flexibility of the inter-ring interactions of the type II GS.

241 Unexpected, CsGSIb<sup>Pen</sup> exhibited high conformational heterogeneity and 3D particles  
242 classification generated three similar structures with the r.m.s.d. ranging from 0.6 to 0.8  
243 Å, differing in a few peripheral regions (Fig. S9a). The most striking difference between  
244 CsGSIb<sup>Pen</sup> and CsGSIb<sup>Dec</sup> is that several regions are missing in the electron density  
245 map of all three classifications of CsGSIb<sup>Pen</sup> particles, with only 229 to 255 out of 356  
246 residues electron densities in presence. As a result, CsGSIb<sup>Pen</sup> demonstrated a  
247 decagram-shaped density map with a few regions missing at the rim (Fig. 4a and Fig.  
248 S9a), in sharp contrast to a pentagon-shaped map yielded by the CsGSIb<sup>Dec</sup> particles  
249 (Fig. 4b). For the 229-255 residues that show clear density in CsGSIb<sup>Pen</sup> particles, the  
250 conformation of each subunit in three CsGSIb<sup>Pen</sup> EM structures, as well as the  
251 arrangement pattern, closely resembles that of the CsGSIb<sup>Dec</sup>, as evidenced by r.m.s.d.  
252 in the range of 0.7-1.0 Å (Fig. S9b-d). This result suggest the structures of rigid portion  
253 of CsGSIb are not significantly altered upon pentamer association. The density-missing  
254 regions include the segments around residues of 110-117, 140-166, and 260-334,  
255 among which, the fragment around residues 260-334 is a major component making up  
256 an integral catalytic site (Fig. 4c), while the segment of residues 140-166 comprising of

257 the two gear teeth is responsible for ring-ring interaction (Fig. 3d-f and Fig. 4d). As  
258 electron density missing often reflects the conformational heterogeneity arising from  
259 internal motions <sup>17</sup>, these observation strongly suggest that the conformation of  
260 CsGSIIb<sup>Pen</sup> active site is highly dynamic, contrasting sharply to the conformationally  
261 largely homogeneous CsGSIIb<sup>Dec</sup>. In support this, thermal shift assays show the melting  
262 temperature ( $T_m$ ) of wild-type CsGSIIb is significantly lower than that of its mutants of  
263 I143L or EVK138DIQ, indicating of structural instability for the pentameric GSII (Fig.  
264 S10). We therefore conclude that the dramatically difference in the dynamic property of  
265 catalytic sites accounts for the distinct activities of pentameric and decameric CsGSIIb.  
266 Taken together, our cryo-EM structures allow us to propose a dynamics-driven allosteric  
267 mechanism of how the GSII activity is regulated by changes in oligomeric state: (1) The  
268 active sites within isolated CsGSIIb<sup>Pen</sup> rings are highly disordered and the unstable  
269 catalytic environments render it catalytically inactive; (2) Upon stacking of two  
270 pentameric rings and formation of a decamer, the signals of interactions mediated by  
271 the gear teeth of each intervening subunit are allosterically propagated to the  
272 active sites, which reduce their conformational dynamics and in turn, unlock the  
273 catalytic potential of GSII (Fig. 4e).

#### 274 **Activation of the GSII by the 14-3-3 scaffold protein**

275 Having mechanistically established the allosteric coupling between GSII activity and its  
276 quaternary assembly status, we next asked whether there exist cellular factors that may  
277 regulate the CsGSIIb activity, potentially via favoring its decamer assembly. 14-3-3  
278 proteins are an important family of scaffold proteins that bind and regulate many key

279 proteins involved in diverse intracellular processes in all eukaryotic organisms<sup>18-20</sup>. In  
280 particular, self-dimerization of 14-3-3 proteins, which induces dimerization of their  
281 clients, plays a key role in its functional scaffolding and subsequent activity regulation  
282<sup>18,19,21</sup>. Moreover, it has been reported that 14-3-3 proteins act as an activator of GSs in  
283 various plants<sup>22-25</sup>, although the detailed activation mechanism remains unclear. Based  
284 on these findings, here we tentatively provide the missing link in mechanistically  
285 assigning the role 14-3-3 proteins play in regulating GS activity: One protomer of the 14-  
286 3-3 protein recognizes one phosphorylated GSII pentamer, and its self-dimerization  
287 brings two pentamer rings in close proximity and therefore promotes decamer assembly,  
288 which, in turn, switches on the GS activity via allosteric rigidification of the catalytic sites  
289 (Fig. 5a). One prerequisite for this proposal is that, for the GS species whose activities  
290 being 14-3-3 protein-dependent, they must have an intrinsically weak decamer-forming  
291 propensity that is to be overcome by 14-3-3. In support of this, the GS from *Medicago*  
292 *truncatula*, whose activity is simulated upon binding to 14-3-3 protein<sup>24</sup>, has been  
293 shown to exhibit a dynamic pentamer-decamer transition<sup>12</sup>, similar to the CsGSIIb  
294 presented here (Fig. 1d). Moreover, it has been shown that only the higher order  
295 complex of tobacco GS-2 that is bound to 14-3-3 is catalytically active<sup>25</sup>.

296 To further support the above proposal, we then explored whether the activity of the  
297 weak-decamer forming CsGSIIb could also be regulated by 14-3-3 scaffold protein.  
298 Homology search against tea plant genome revealed several candidate tea plant Cs14-  
299 3-3 proteins (Fig. S11). Analysis of their coding genes' expression patterns in tea plant  
300 tissues and in nitrogen assimilation or metabolism-related processes allowed us to  
301 identify *Cs14-3-3-1a* and *Cs14-3-3-1b* genes that displayed expression patterns highly

302 similar to *CsGSI* genes (Fig. 5a and S12). Moreover, the expression levels of *Cs14-3-*  
303 *3-1a* and *Cs14-3-3-1b* genes were regulated upon changes in the availability of  
304 ammonia (Fig. 5b and 5c), the substrate of GS, suggesting both *Cs14-3-3-1a* and *Cs14-*  
305 *3-3-1b* are physiologically related to GS. We then examined the *in vivo* interactions  
306 between *Cs14-3-3-1a* and *CsGSIb* using the bimolecular fluorescence complementation  
307 (BiFC) technique, which is based on complementation between two non-fluorescent  
308 fragments of a fluorescent protein when they are brought together by interactions  
309 between proteins fused to each fragment<sup>26</sup>. *Cs14-3-3-1a* or *CsGSIb* were fused in  
310 frame with N-terminal half of a yellow fluorescence protein (NYFP) or C-terminal half of a  
311 yellow fluorescence protein (CYFP), respectively, and expressed in tobacco leaf  
312 epidermal cells alone or in various combinations, such as *CsGSIb*<sup>CYFP</sup> alone or together  
313 with *Cs14-3-3-1a*<sup>NYFP</sup>. As expected, *Cs14-3-3-1a* and *1b* could self-dimerize or form  
314 heterodimers in plant cells (Fig. 5e), consistent with 14-3-3 scaffold proteins adopting a  
315 dimeric structure<sup>18,19,21</sup>. Importantly, formation of the fluorescent complex clearly  
316 demonstrated the interaction of *Cs14-3-3-1a* with *CsGSIb* (Fig. 5f). In order to further  
317 establish the functional relevance, we performed the RNA interference (RNAi) technique  
318 to knock down the transcript level of *Cs14-3-3-1a* gene in hairy roots of chimerical  
319 transgenic tea seedlings (Fig. 5h), and evaluated the impact on GS activity by  
320 measuring the contents of GS catalysis product, glutamine. We show that, along with  
321 the reduction in *Cs14-3-3-1a* transcript level, the glutamine contents (Fig. 5i), as well as  
322 the crude enzyme activity (Fig. 5j), were drastically reduced, indicating the 14-3-3  
323 protein in *Camellia sinensis* functions as an activator molecule of *CsGSIb*. Further work

324 is needed to elucidate the detailed mechanism of how *Cs14-3-3-1a* recognizes  
325 phosphorylated CsGS1b.

326

## 327 **Discussion**

328 Proper assembly of individual protein units into functional complexes is fundamental to  
329 nearly all biological processes. Comparing to the oligomer assembled in relatively  
330 simple cyclic symmetry that contains only interfaces of subunits related by the rotational  
331 symmetry, protein complexes organized in dihedral symmetry, an extra step of  
332 assembly during evolution, possess interfaces that are related by both the rotational  
333 symmetry and the perpendicular two-fold axes. However, in many cases, the functional  
334 demand for such structural complexity remains poorly understood. Here, by using GS  
335 as a model system, we unveil a previously uncharacterized allosteric code buried in a  
336 supramolecular protein complex with dihedral symmetry, and show how dynamic  
337 packing of protein subcomplexes could build an extra allosteric control for activity  
338 modulation.

### 339 **Dynamics-driven allostery induced by assembly status transition**

340 Allostery describes the mechanism that binding effector molecules at one site triggers  
341 a conformational or dynamic change at a distant site, thereby affecting protein activity.  
342 Allosteric regulation is a common mechanism to regulate protein function, playing  
343 critical roles in various cellular activities ranging from the control of metabolic  
344 mechanisms to signal-transduction pathways <sup>27</sup>. Based on the data from Allosteric  
345 Database <sup>28</sup>, to date more than 1,900 proteins have been defined as allosteric. Most  
346 allosteric modulators identified are small ligands or peptides, whereas in some rare

347 cases the allosteric effects are induced by protein oligomerization in a rather simple  
348 system<sup>29</sup>. Here we show that the oligomeric GS ring functions as positive modulator,  
349 the largest allosteric modulator identified so far to our knowledge; and the ring-ring  
350 association, which is motivated by 14-3-3 protein or other factors, leads to a transition of  
351 assembly symmetry from C5 to D5 and subsequently triggers allosteric activation.

352 We show here that the assembly geometry of GS plays a critical role in determining  
353 the protein functional motion properties (Fig. 4). Indeed, protein internal dynamics have  
354 been shown essential for functions; and allosteric proteins can be regulated  
355 predominantly by changes in their structural dynamics<sup>30-33</sup>. The dynamics-driven  
356 allosteric mechanism presented here, in which the GSII activity is allosterically regulated  
357 by the change in conformational fluctuating properties of active sites via inter-ring  
358 communication, provides another fascinating example of the interplay between a  
359 protein's dynamics and function.

360 **The allosteric mechanism of GSII offers a robust and tunable regulatory**  
361 **machinery.**

362 Being a key enzyme implicated in many aspects of the complex matrix of nitrogen  
363 metabolism, GS must be strictly regulated. Decades of efforts have been applied to  
364 understand how GS is controlled at gene, transcript and protein levels<sup>34</sup>. Studies have  
365 demonstrated positive cooperativity of GS with regard to different substrates and  
366 cofactors, such as L-glutamate<sup>35</sup> and metal cations<sup>36</sup>; and GS functions are regulated  
367 by multiple post-translational mechanisms including nitration, oxidative turnover and  
368 phosphorylation<sup>37</sup>, and by the 14-3-3 protein<sup>22-25</sup>. Our results reconcile with many of  
369 the above observations, and allow us to gain a more complete picture of how GS



370 activity is regulated in cells by an exquisite machinery (Fig. 6). While the protein  
371 turnovers machineries to adjust cellular enzyme level can always provide means to  
372 modulate pentamer-decamer transitions and thus deactivation-activation conversion of  
373 GSII, we argue that phosphorylation-dephosphorylation processes, coupled with 14-3-3  
374 binding and subsequent allosteric activation, may enable a more efficient regulatory way.  
375 When sufficient reaction products are available demanding low glutamine synthesis  
376 activity, GSII is kept in the dephosphorylated state by certain phosphatase and exists as  
377 isolated inactive single-ringed pentamers. In the physiological context of high demand of  
378 glutamine, phosphorylation of GSII by certain kinase prompts 14-3-3 protein binding,  
379 and the intrinsic dimerization property of 14-3-3 recruits two GSII pentamer rings in  
380 close proximity and in doing so, result in a rapid transition of quaternary assembly from  
381 the pentamer to decamer, and eventually enzymatic activation. In this manner, the  
382 poised GSII pentamer ring itself acts as a positive effector and the allosteric ring-ring  
383 association offers a great advantage of immediate response to precisely meet the ever-  
384 changing metabolic needs, whereas the reversible assembly-disassembly behavior  
385 enables a tunable mode for activity modulation. Indeed, the dynamic association-  
386 disassociation of GSII subcomplexes, a prerequisite for this modulatory machinery,  
387 have been widely observed in various species including humans <sup>38</sup>, plants other than  
388 *Camellia sinensis* reported here <sup>12,15</sup> and fungi <sup>39</sup>. Therefore, the dynamics-driven  
389 allostery shown here may represent a general regulatory machinery harnessed by many  
390 eukaryotes to ensure optimal utilization of nitrogen sources, and the infrastructure of  
391 fragile ring-ring contacts evolutionarily chosen by many eukaryotes offers a convenient  
392 and robust avenue for activity regulation.

393 **Practical implications**

394 As a crucial enzyme to all living organisms, which is involved in all aspects of nitrogen  
395 metabolism, GS has emerged as an attractive target for drug design <sup>40</sup> and herbicidal  
396 compounds development, as well as a suitable intervention point for the improvement of  
397 crop yields <sup>41</sup>. However, because the overall geometry of the active site is the most  
398 conserved structural element amongst GS enzymes <sup>4,7,11</sup>, the traditional strategy of  
399 selective inhibition, which relies heavily on the subtle difference in the active sites from  
400 different species, has only achieved limited success. Thus, the regulatory mechanism  
401 discovered here will help guide the search for specific inhibitors of potential therapeutic  
402 interest. For example, inhibition of the GS in *Mycobacterium tuberculosis* has long been  
403 recognized as a novel antibiotic strategy to treat tuberculosis <sup>42-44</sup>. Our result opens new  
404 possibilities to develop chemicals to target the drugable ring-ring interface region and  
405 specifically interrupt the interactions between two GS subcomplexes in pathogens or  
406 unwanted plants to develop new types of herbicide. Moreover, although overexpression  
407 of GS has been investigated extensively for decades with the goal of improving crop  
408 nitrogen use efficiency, the outcome has not been consistent <sup>41</sup>. The modulatory “hot-  
409 spots” identified here, which mediate inter-ring communication and in turn stimulate GS  
410 activity, will guide engineering catalytically more powerful GSs for crops in which  
411 pentamer units only weakly associate, and thus increase plant nitrogen use efficiency  
412 and crop production.

413

414

415

416

417

418

419

420

421

422

423

424

425

426

427

428

429 **Methods:**

430 Cloning, expression, and protein purification of GSs

431 The target genes encoding CsGS1b from *Camellia sinensis* (Genbank accession No. MK716208)  
432 and GmGS $\beta$ 2 from *Glycine max* (Genbank accession No. NM001255403) were cloned into the pET-  
433 16b vector (Novagen) containing a His<sub>6</sub>-tagged-MBP tag followed by a tobacco etch virus (TEV)  
434 protease cleavage site at the N-terminus. All constructs were transformed into *E. coli* Rosetta (DE3)  
435 cells, which were cultured in Luria-Bertani (LB) medium at 37 °C supplemented with ampicillin (100  
436  $\mu$ g/ml) and chloramphenicol (35  $\mu$ g/ml) to an OD<sub>600</sub> ~0.8. Cells were induced by the addition of  
437 isopropyl- $\beta$ -D-1- thiogalactopyranoside (IPTG) to the concentration of 0.3 mM, and incubated for  
438 additional 16 hours at 18 °C. Cells were harvested by centrifugation at 5000g for 20 min and  
439 resuspended in lysis buffer (50 mM Tris-HCl, 500 mM NaCl, pH 8 and 1 mM PMSF).

440 Cells were subjected to a high-pressure homogenizer, named JN-Mini Pro Low-temperature Ultra-  
441 high-pressure cell disrupter (JNBIO) and then centrifuged at 50,000g for 30 min at 4°C. Proteins  
442 were initially purified using Ni Sepharose 6 Fast Flow resin (GE Healthcare). The protein tags were  
443 cleaved with His-tagged TEV-protease overnight at 4 °C while dialyzing against TEV cleavage buffer  
444 (50 mM Tris-HCl, 100 mM NaCl, 1 mM  $\beta$ -mercaptoethanol, pH 8). Cleaved sample was collected  
445 and run over Ni-NTA column to remove His-tagged TEV and protein tags. Flow-through was  
446 collected, concentrated and passed over Hiload 16/600 Superdex 200 column (GE Healthcare) in  
447 50mM Tris-HCl, pH 7.4, 100 mM NaCl, 0.5 mM  $MgCl_2$  and 1.5 mM  $\beta$ -mercaptoethanol.

#### 448 Multi-angle light scattering (MALS) characterization

449 MALS was measured using a DAWN HELEOS-II system (Wyatt Technology Corporation)  
450 downstream of a GE liquid chromatography system connected to a Superdex 200 10/300 GL (GE  
451 Healthcare) gel filtration column. The running buffer for the protein samples contained 50 mM KPi  
452 (pH 7.0), 100 mM NaCl, 1 mM  $\beta$ -mercaptoethanol and 0.05 %  $NaN_3$ . The flow rate was set to 0.5 mL  
453  $min^{-1}$  with an injection volume of 200  $\mu L$ , and the light scattering signal was collected at room  
454 temperature ( $\sim 23^\circ C$ ). The data were analyzed with ASTRA version 6.0.5 (Wyatt Technology  
455 Corporation).

#### 456 Glutamine synthetase activity assay

457 GS activity assay was performed described previously<sup>45,46</sup> and reactions were performed for 30  
458 min at 37°C in 50mM Tris-HCl, pH 7.4, 100mM NaCl, 0.5 mM  $MgCl_2$  and 1.5 mM  $\beta$ -mercaptoethanol.  
459 Enzymatic activity comparison was conducted with 1  $\mu M$  (monomer) enzyme in the presence of 0.5  
460 mM  $NH_4HCl$ , 2 mM L-glutamate, 0.5 mM ATP. Steady-state kinetic analysis was performed under  
461 the same conditions except with the variable concentration of ammonium chloride from 0.05 mM to 4  
462 mM. Steady-state kinetic parameters were determined by double reciprocal Lineweaver-Burk plot for  
463 reactions that followed Michaelis-Menten kinetics. All experiments were repeated independently at  
464 least three times.

#### 465 Fluorescent dye-monitored thermal shift assays

466 Reactants containing 2 $\mu$ M CsGS1b (monomer) and 1000-fold diluted Sypro Orange in 50mM Tris-  
467 HCl, pH 7.4, 100mM NaCl and 1.5mM  $\beta$ -mercaptoethanol were performed using an iCycler  
468 thermocycler (Bio-Rad) as previous described<sup>13</sup>. Briefly, CsGS1b in presence of various  
469 concentrations of the following ligands were tested, alone and in combination: 10mM glutamate,  
470 20mM MgCl<sub>2</sub> and 1mM ATP. The temperature of the reactions was increased from 20 to 90 °C in  
471 increments of 0.2 °C/12 s, coincident with a fluorescent measurement at each step. The  
472 wavelengths for excitation and emission were set to 490 and 575 nm, respectively. Fluorescence  
473 changes were monitored simultaneously with a charge-coupled device (CCD) camera. To obtain the  
474 temperature midpoint for the protein unfolding transition, T<sub>m</sub>, a Boltzmann model was used to fit the  
475 fluorescence imaging data obtained by the CCD detector using the curve-fitting software GraphPad  
476 Prism 7.0.

#### 477 Analytical ultracentrifugation (AUC)

478 Sedimentation velocity experiments were carried out with a Proteomelab XL-A analytical  
479 ultracentrifuge (Beckman Coulter, USA) using a four-hole An-60 Ti analytical rotor. An aliquot of 410  
480  $\mu$ L of buffer (50 mM Tris-HCl, pH 7.4, 100 mM NaCl and 1.5 mM  $\beta$ -mercaptoethanol) as the  
481 reference and 400  $\mu$ L of protein solution (0.1/0.25/0.5 mg·mL<sup>-1</sup>) were loaded into a double-sector  
482 cell. A centerpiece with a path length of 12 mm was used. The speed of rotor was 35,000 rpm. The  
483 operation temperature of rotor was 20 °C. The time dependence of the absorbance at different radial  
484 positions was monitored at a wavelength of 280 nm by an UV-Vis absorbance detector, and the  
485 data were analyzed by the software SEDFIT (version 15.01b) using c(s) model to obtain the  
486 sedimentation coefficient distribution. Viscosity and density of the buffer solution were calculated by  
487 the Sednterp software.

#### 488 Single-particle cryo-electron microscopy data collection

489 Purified protein samples of CsGS1b (4  $\mu$ L, 0.02 mg/mL) and GmGS $\beta$ 2 (4  $\mu$ L, 0.02 mg/mL) in 50  
490 mM Tris-HCl, pH 7.4, 100 mM NaCl, and 1.5 mM  $\beta$ -mercaptoethanol were negatively stained with  
491 uranyl acetate 1% (w/v) on carbon-film 400 mesh copper grids. Samples were imaged using a FEI  
492 T12 operated at 120 keV with a 3.236 Å pixel size, 68,000 $\times$  nominal magnification, and defocus

493 range about 1.5  $\mu\text{m}$ . For cryo-EM, 3  $\mu\text{L}$  of CsGS1b (0.1 mg/mL and 0.5 mg/mL) and GmGS $\beta$ 2 (0.1  
494 mg/mL) were added onto glow-discharged Quantifoil R1.2/1.3 100 holey-carbon Cu grids with a  
495 Vitrobot Mark IV (Thermo Fisher Scientific). The grids were blotted for 3.5 s at 8  $^{\circ}\text{C}$  with 100%  
496 humidity, and then plunged frozen into liquid ethane cooled by liquid nitrogen. Cryo-grids were first  
497 screened on a FEI TF20 operated at 200 keV. Images of CsGS1b and GmGS $\beta$ 2 were collected using  
498 Titan Krios G3i microscope (FEI) operated at 300 kV with a Gatan K2 Summit direct detection  
499 camera. Two datasets were acquired using the SerialEM in super-resolution mode with a nominal  
500 magnification of 29,000x, yielding a pixel sizes of 0.505  $\text{\AA}$  with a total dose of 51  $\text{e}/\text{\AA}^2$ . The defocus  
501 ranges were set from  $-1.6 \mu\text{m}$  to  $-2.3 \mu\text{m}$ .

### 502 Cryo-electron microscopy image processing, 3D reconstruction, and analysis

503 All processing steps were performed using cryoSPARC<sup>47</sup>. A total of 4,051 raw movie stacks  
504 acquired for CsGS1b and 1,777 raw movie stacks for GmGS $\beta$ 2 were subjected to patch motion  
505 correction and patch CTF estimation. An initial set of about 500 particles were manually picked to  
506 generate 2D templates for auto-picking. The auto-picked particles were extracted by a box size of  
507 512 pixel and then subjected to reference-free 2D classification. After particle screening using 2D  
508 and 3D classification, the final 355,289 particles for CsGS1b and 115,795 particles for GmGS $\beta$ 2 were  
509 subjected to Ab-Initio Reconstitution and followed by 3D Refinement with C5 symmetry imposed.  
510 Four different conformational states were obtained for CsGS1b, resulting in a 3.3  $\text{\AA}$  density map for  
511 CsGS1b<sup>Dec</sup>, 3.5  $\text{\AA}$  density map for CsGS1b<sup>Pen</sup> State I, 3.6  $\text{\AA}$  density map for CsGS1b<sup>Pen</sup> State II, and  
512 3.4  $\text{\AA}$  density map for CsGS1b<sup>Pen</sup> State III. Only one major conformation was obtained with 2.9  $\text{\AA}$   
513 density map for GmGS $\beta$ 2. The global resolution of the map was estimated based on the gold-  
514 standard Fourier shell correlation (FSC) using the 0.143 criterion.

### 515 Model building and structural refinement

516 Homology models of CsGS1b and GmGS $\beta$ 2 were generated with the I-TASSER server<sup>48</sup> and  
517 docked into the cryoEM maps using UCSF Chimera<sup>49</sup>. The sequences were mutated with  
518 corresponding residues in CsGS1b and GmGS $\beta$ 2, followed by rebuilding in Coot<sup>50</sup>. The missing  
519 residues of CsGS1b<sup>Pen</sup> were not built due to the lack of corresponding densities. Real-space

520 refinement of models with geometry and secondary structure restraints applied was performed using  
521 PHENIX<sup>51</sup>. The final model was subjected to refinement and validation in PHENIX. The statistics of  
522 cryo-EM data collection, refinement and model validation are summarized in Table S1.

### 523 Different nitrogen treatments for hydroponically grown tea cuttage seedlings

524 Two-year-old hydroponic tea cuttage seedlings were grown in a greenhouse at 20-25°C until new  
525 tender roots emerged. These healthy tea seedlings were then transferred into hydroponic solutions  
526 with different nitrogen sources, namely, 0 mM NH<sub>4</sub><sup>+</sup> (Shigeki Konishi solution), 5 mM NH<sub>4</sub><sup>+</sup> (Shigeki  
527 Konishi solution with 5 mM ammonium nitrogen), 10 mM NH<sub>4</sub><sup>+</sup> (Shigeki Konishi solution with 10 mM  
528 ammonium nitrogen), and a control (Shigeki Konishi solution alone). All of these tea seedling root  
529 samples were cleaned and collected in liquid nitrogen after treatment for RNA analysis.

### 530 RNA isolation and qRT-PCR analysis

531 Tea plant tissues or root materials were ground in liquid nitrogen into fine powders for total RNA  
532 extraction with an RNA extraction kit (Tiangen Biotech Co., Ltd.) according to the manufacturer's  
533 instructions. RNA quality and purity were assessed by a NanoDrop 2000 spectrophotometer  
534 (Thermo Scientific). The integrity of the RNA samples was rapidly checked by 1.0 % agarose gel  
535 electrophoresis. The total RNA was reverse-transcribed to single-stranded cDNAs using SuperScript  
536 III reverse transcriptase (Invitrogen) according to the manufacturer's instructions. qRT-PCR analysis  
537 was performed using cDNA synthesized by the Prime Script RT Reagent Kit (TaKaRa). Each qRT-  
538 PCR was conducted in a 20-μL reaction mixture containing 2 μL of diluted template cDNA, 0.4 μL of  
539 each specific primer, 10 μL of SYBR Premix Ex-Taq (TaKaRa), and 7.2 μL of H<sub>2</sub>O. All qRT-PCR  
540 assays were performed on the Bio-Rad CFX96 fluorescence-based quantitative PCR platform. The  
541 program used was as follows: 95°C for 5 minutes; 40 cycles of 95°C for 5 s for denaturation and  
542 60°C for 30 s for annealing and extension; and 61 cycles of 65°C for 10 s for melting curve analysis.  
543 All experiments were independently repeated three times, and relative expression levels were  
544 measured using the 2<sup>-ΔCt</sup> method.

### 545 Subcellular localization of CsGSIs and Cs14-3-3-1a&1b

546 Construction of the Cs14-3-3-1a-GFP, CsGSIb-GFP, and Cs14-3-3-1b-GFP fusions were  
547 performed using gateway recombination systems. The corresponding ORFs for CsGSIb and Cs14-3-  
548 3-1a, 1b were subcloned into pK7WGF2 in frame with a GFP tagged at the N-terminus.  
549 Determination of the subcellular localization of these GFP fusions was performed using tobacco leaf  
550 infiltration as previously described (Zhao et al., 2011). Briefly, the pK7WGF2-Cs14-3-3-1a-GFP,  
551 pK7WGF2-Cs14-3-3-1b-GFP, and pK7WGF2-CsGSIb-GFP plasmids were transformed into *A.*  
552 *tumefaciens* strain EHA105, and selected positive colonies harboring these constructs were used for  
553 plant transformation by infiltration. *Acetosyringone*-activated *Agrobacterium* cells were infiltrated into  
554 the *Nicotiana benthamiana* leaves leaf abaxial epidermal surface, and the tobacco plants were  
555 grown at room temperature for 3 days before imaging. Imaging of these GFP fusion proteins was  
556 performed using a confocal microscope with a 100x water immersion objective and appropriate  
557 software. The excitation wavelength was 488 nm, and emissions were collected at 500 nm.

#### 558 In planta interaction between CsGSIb with Cs14-3-3 proteins with Bimolecular 559 Fluorescent Complimentary (BIFC)

560 The ORFs of Cs14-3-3-1a, Cs14-3-3-1b, and CsGSIb were amplified and subcloned into  
561 pCAMBIA1300-eYFPN (YFP N-terminal portion) and pCAMBIA1300-eYFPC (YFP C-terminal portion)  
562 (CAMBIA) by the in-fusion technology. The resulting constructs were transformed into *A.*  
563 *tumefaciens* strains GV3101, which were infiltrated into *Nicotiana benthamiana* leaves individually or  
564 in different pair combinations. A Leica DMI8 M laser scanning confocal microscopy system was used  
565 for fluorescence observation, according to the method described previously<sup>52</sup>. If the fluorescence  
566 signal could be detected with any interaction pair, the pair of half YFP-fusion proteins should interact.

#### 567 Knockdown of Cs14-3-3-1a in tea plant hairy roots

568 Approximately 400 bp of the gene-specific fragments from Cs14-3-3-1a were amplified and  
569 subcloned into the final RNA interference (RNAi) destination vector pB7GWIWG by BP and LR  
570 clonase-based recombination reactions (Invitrogen). The resulting binary vectors pB7GWIWG-Cs14-  
571 3-3-1a were transformed into *A. rhizogenes* strain ATCC 15834 by electroporation. The selected



572 positive transformants harboring pB7GWIWG-Cs14-3-3-1a were used to transform 3-month-old tea  
573 seedlings, which were pretreated with acetosyringone. The positive transgenic hairy root lines were  
574 verified with qRT-PCR for examination of transgene expression. At least three independent hairy  
575 root lines were selected for further analysis.

#### 576 Determination of free amino acids in tea plant samples

577 The free amino acids in tea plant samples were analyzed by using an amino acid analyzer (L-8900,  
578 Hitachi) according to manufacture instruction. The free amino acids were extracted from 120 mg  
579 leaves with 1 mL of 4% sulfosalicylic acid in water bath sonication for 30 min and then centrifuged at  
580 13,680 x g for 30 min. The debris was re-extracted once again and the supernatants from two  
581 extractions were combined as previously described<sup>53</sup>. The supernatants were filtered through a  
582 0.22 µm Millipore filter before analysis. A mobile phase containing lithium citrate for amino acid  
583 derivatization and UV–Vis detection at 570 and 440 nm were used in the Hitachi High-Speed Amino  
584 Acid Analyzer system. The flow rates were set at 0.35 mL/min for the mobile phase and 0.3 mL/min  
585 for the derivatization reagent. The temperature for separation column was set to 38 °C, and for the  
586 post-column reaction equipment was maintained at 130 °C. The temperature of the autosampler was  
587 kept at 4 °C. The peak areas of amino acids were quantified in comparison with the amino acid  
588 standards.

#### 589 GS activity assay from plant samples

590 To determine the total GS activity, 100 mg of frozen plant samples were grounded into fine powder  
591 in liquid nitrogen. Samples were homogenized in extraction buffer (50 mmol/L Tris-HCl, pH 8.0,  
592 2 mmol/L MgSO<sub>4</sub>, 4 mmol/L dithiothreitol, and 0.4 mmol/L sucrose). Plant extracts were centrifuged  
593 at 13,680 x g (4 °C) for 25 min and the supernatants of extracts were analyzed for the soluble protein  
594 content using the Bradford assay. GS activity was determined after incubating the enzyme extracts  
595 in a reaction buffer (100 mmol/L Tris-HCl, 80 mmol/L MgSO<sub>4</sub>, 20 mmol/L sodium glutamate, 80 mM  
596 NH<sub>4</sub>OH, 20 mmol/L cysteine, 2 mmol/L EGTA and 40 mmol/L ATP) at 37 °C for 30 min<sup>54</sup>. A stop  
597 solution containing 0.2 mol/L Trichloride acetic acid, 0.37 mol/L FeCl<sub>3</sub> and 0.6 mol/L HCl was added;

598 and the absorbance of enzyme reactions at 540 nm was recorded. A standard curve was made in an  
599 identical way for calculation of the specific enzyme activity.

600

601

602

603

604

605

606

607

608

609

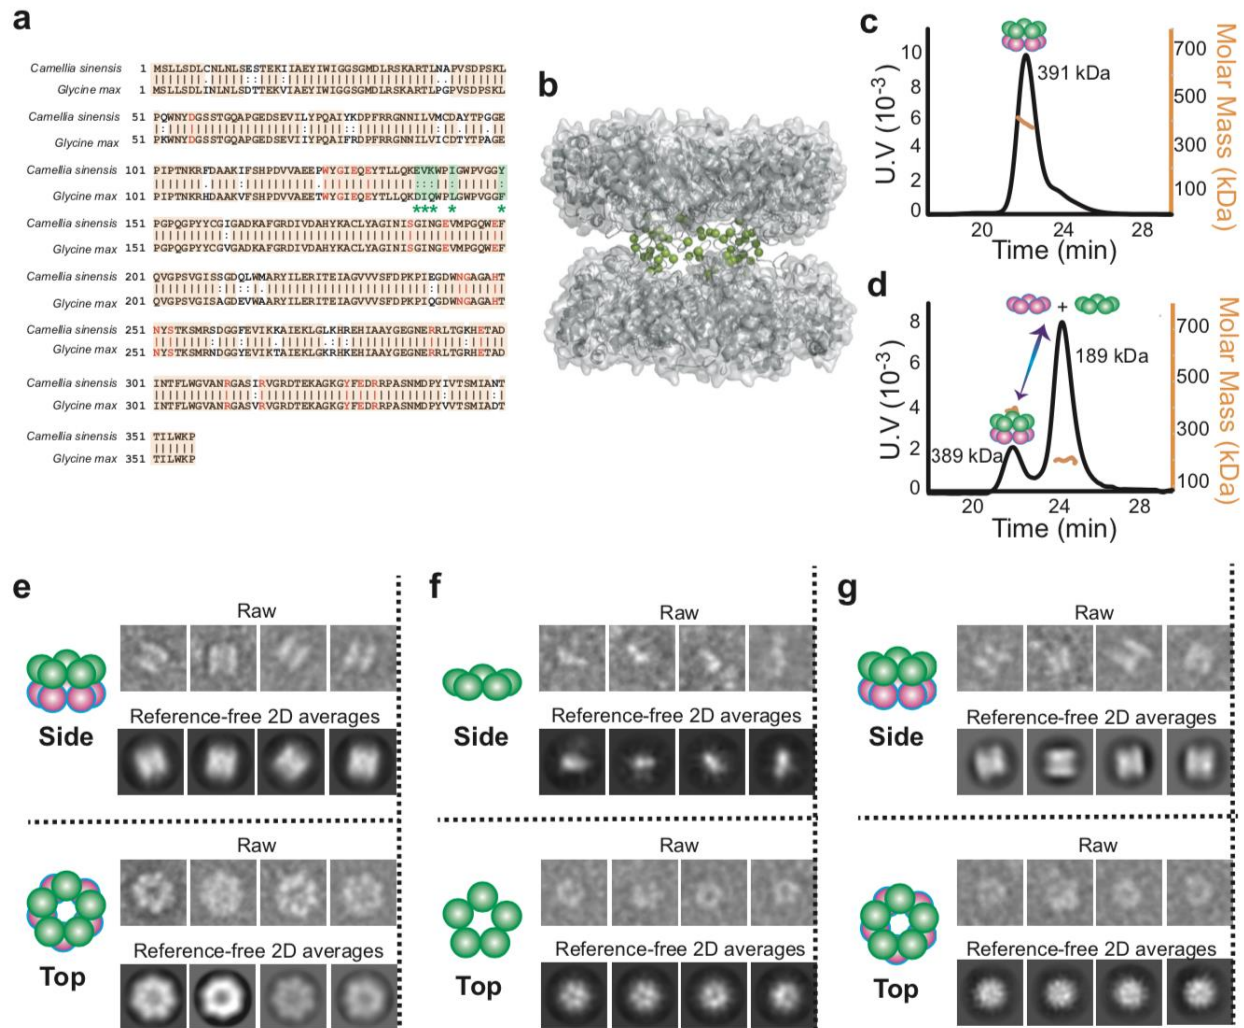

610

611 **Fig. 1: Quaternary assembly property comparison of GSIIb from *Camellia sinensis***  
 612 **(CsGSIIb) and *Glycine max* (GmGSIIβ2).**

613 **a**, Amino acid sequence alignment of CsGSIIb and GmGSIIβ2 reveals very high level of  
 614 conservation. Identical amino acids are shown with orange boxes, while the residues  
 615 involved in substrate-binding and catalysis are shown in red. Amino acids variations  
 616 located at the pentamer ring-ring interface are highlighted in green boxes with the  
 617 symbol of \*. **b**, Model structure built based on the crystal structure of a maize GSII

618 (GmGS $\beta$ 2, pdb code 2D3B). The amino acid variations between CsGS1b and GmGS $\beta$   
619 that are located at the ring-ring interface are highlighted as spheres in green. **c-d**, SEC-  
620 MALS analysis of GmGS $\beta$ 2 (c) and CsGS1b (d). **e-g**, Quaternary assembly analysis of  
621 GmGS $\beta$ 2 and CsGS1b using negative-stain electron microscopy. Left: Examples of  
622 single raw images; Middle: reference-free two-dimensional class averages. Right: A  
623 schematic representation of the averages is shown for clarity. GmGS $\beta$ 2 adopts a  
624 homogenous double-ringed structure (e), while the CsGS1b demonstrates a mixture of  
625 two major classes of particles: isolated pentamer ring (f) and double-ringed structure (g).

626

627

628

629

630

631

632

633

634

635

636

637

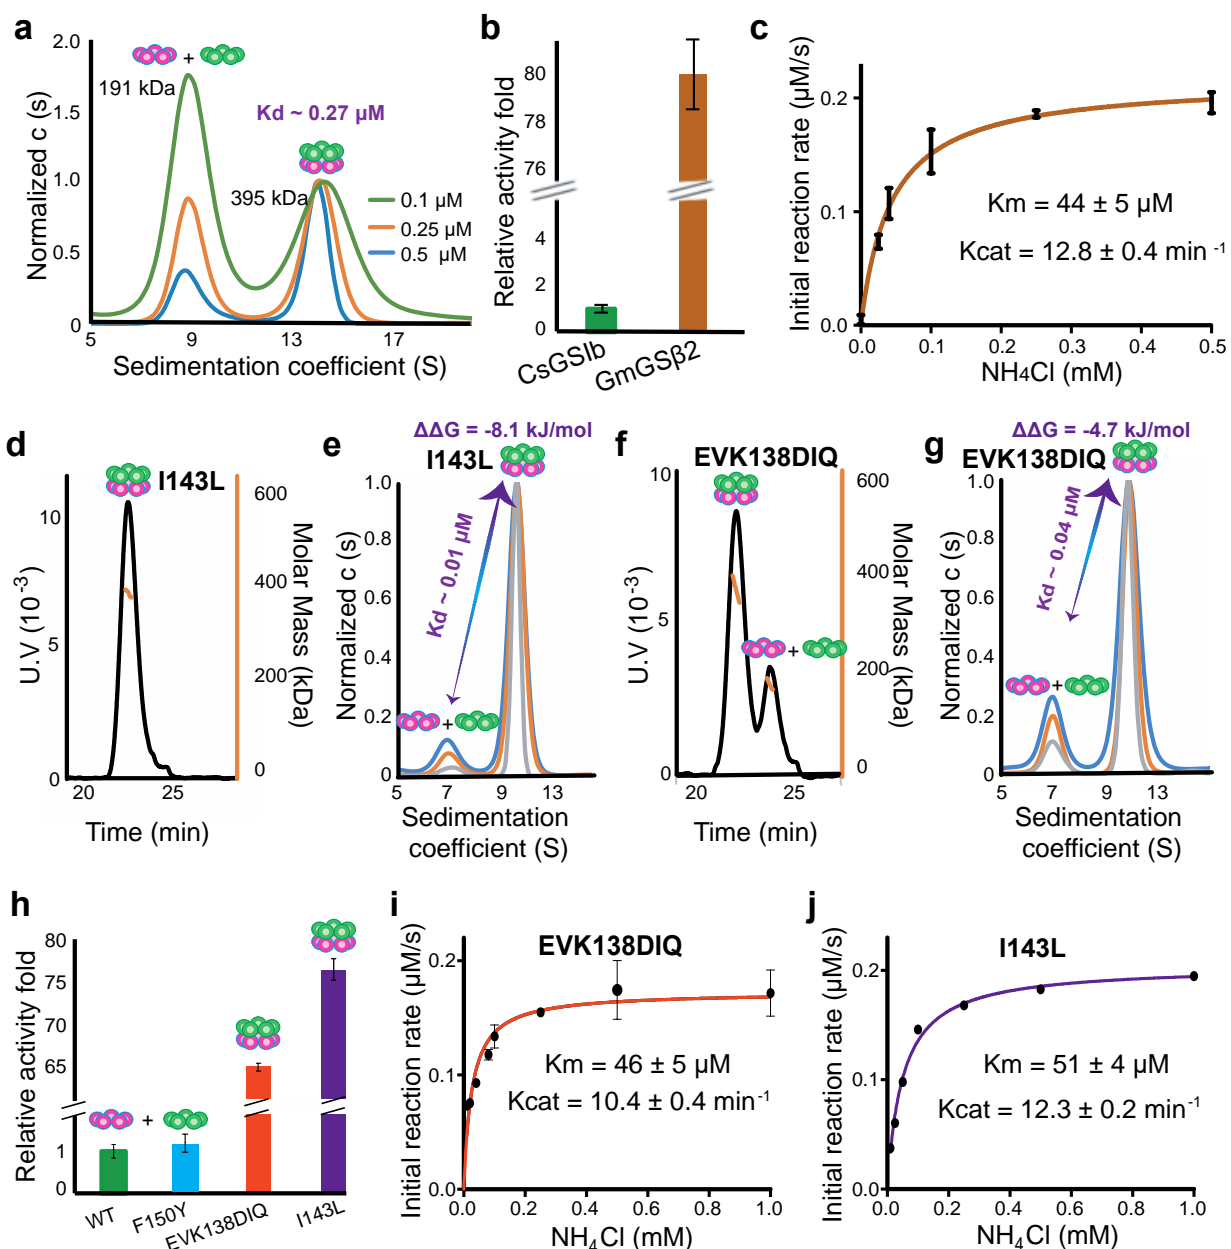

638

639

640 **Fig. 2: The enzymatic activities of CsGS1b is dependent on its quaternary**  
 641 **assembly status.**

642 **a**, Application of analytical ultracentrifugation (AUC) to assess the pentamer-decamer  
 643 dissociation constant of CsGS1b. Experiments were performed at room temperature with  
 644 three different sample concentrations shown as monomer concentration. A global fit of

645 sedimentation distribution profiles yielded a dissociation constant of 0.27  $\mu$ M. **b**,  
646 Enzymatic activity comparison of GmGS $\beta$ 2 with CsGS1b. Reactions were performed for  
647 30 min at 37°C in presence of 1  $\mu$ M (monomer) enzyme and saturated amounts of  
648 substrates. **c**, Steady-state kinetic analysis of GmGS $\beta$ 2. Assay conditions were the  
649 same as that in **b**, except the concentrations of NH<sub>4</sub>Cl were varied. **d-g**, Mutation effects  
650 on the quaternary assembly property of CsGS1b evaluated using SEC-MALS (**d** and **f**)  
651 and AUC (**e** and **g**). The corresponding mutants are labeled in the figures. **h**, Activity  
652 comparison of the wild type GmGs18 with its mutants as labeled. Reactions were  
653 performed in the same condition as **b**. **i-j**, Steady-state kinetic analysis of GmGS $\beta$ 2  
654 mutants of EVK138DIQ (**i**) and I143L (**j**). Reaction conditions were same as in **c**. All  
655 enzyme assays were repeated at least three times and data were shown as means  $\pm$   
656 s.d.

657

658

659

660

661

662

663

664

665

666

667

668

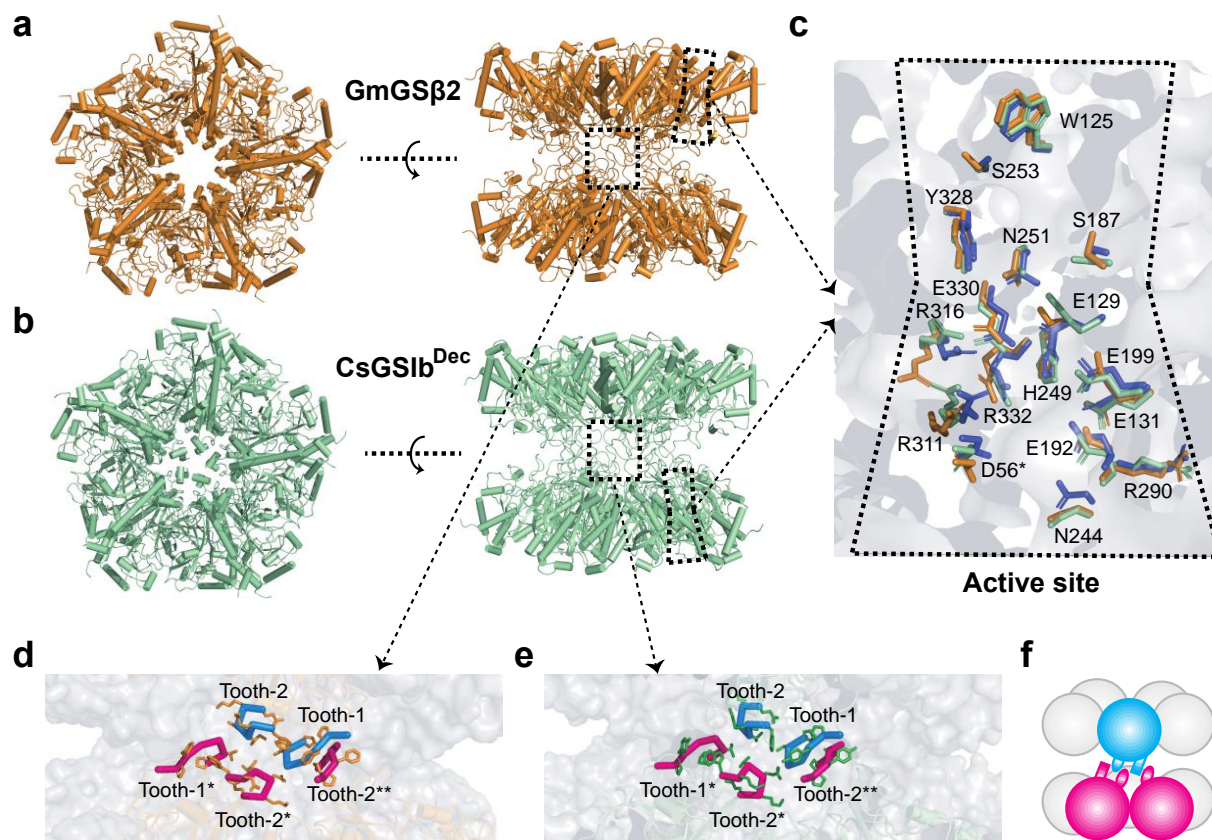

669

670 **Fig. 3: Overall structures, catalytic centers and ring-ring interfaces of GmGSβ2**  
671 **and CsGSIIb<sup>Dec</sup>.**

672 **a-b**, Overall double-ringed structures of GmGSβ (a) and CsGSIIb<sup>Dec</sup> (b). Left: top-view;  
673 Right: Side-view. **c**, Superimposed structures of the catalytic centers of GmGSβ2  
674 (orange), CsGSIIb<sup>Dec</sup> (green) and GSII from maize (purple). High structure similarities in  
675 catalytic sites suggest the catalytic mechanism for these three GSII species are  
676 essentially identical. **d-e**, The detailed ring-ring interaction interfaces between GmGSβ2  
677 (d) and CsGSIIb<sup>Dec</sup> (e). The interactions between two pentameric rings are primarily  
678 mediated by two regions, namely, the tooth-1 and tooth-2, respectively. (f), A schematic

679 representation of the two GSII pentameric rings interlocked by tooth-1 and tooth-2 for  
680 clarity.

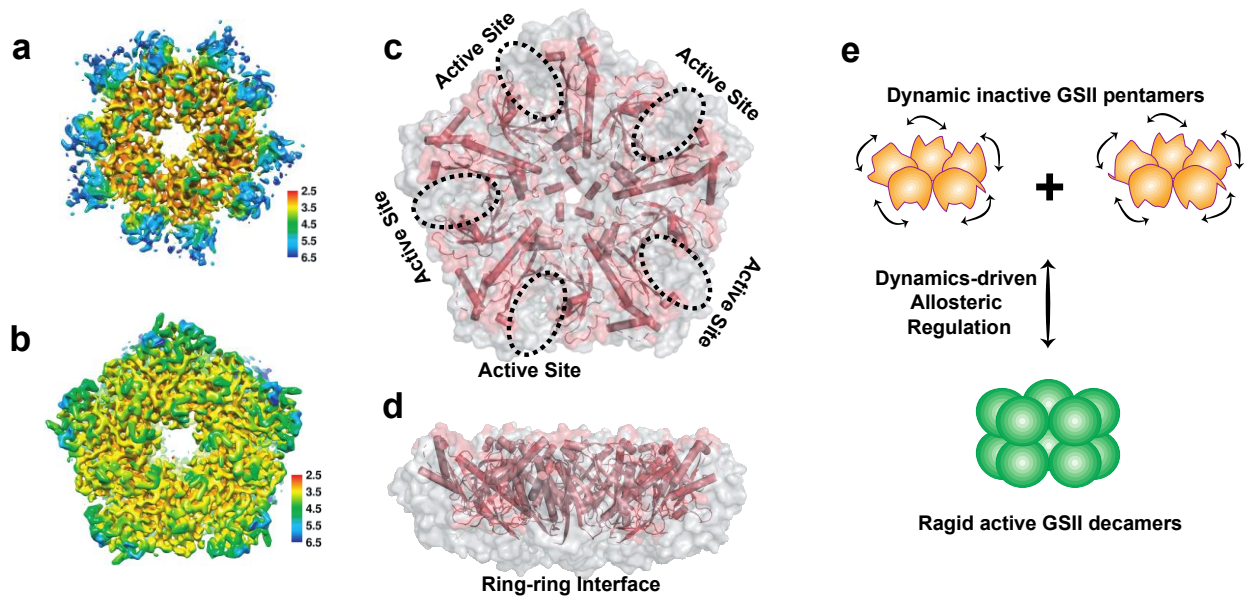

681  
682 **Fig. 4: Cryo-EM structure of CsGSIIb<sup>Pen</sup> features high conformational flexibility.** For  
683 simplicity, only one out three CsGSIIb<sup>Pen</sup> cryo-EM structures are presented here, and all  
684 three structures are shown in Fig. S9. **a**, Local resolution of the density map of  
685 CsGSIIb<sup>Pen</sup> indicates a decreased resolution near the edges of the pentamer ring. **b**,  
686 Local resolution of the density map of CsGSIIb<sup>Dec</sup> map. The conformational flexibility is  
687 apparent when the missing density at the rim of CsGSIIb<sup>Pen</sup>, which yields a largely  
688 decagram-shaped map (**a**), is compared to the intact density of CsGSIIb<sup>Dec</sup> that displays  
689 a pentagon-shaped map (**b**). **c-d**, Superimposed of Cryo-EM structure of CsGSIIb<sup>Pen</sup>  
690 (pink) with that of CsGSIIb<sup>Dec</sup> (grey surface). **c**: Top-view; **d**: Side-view. The results  
691 reveal two major regions being highly disordered: the rim region including the catalytic  
692 center, and ring-ring interface. **e**, Proposed dynamics-driven allosteric model of CsGSIIb.  
693  
694



695

696

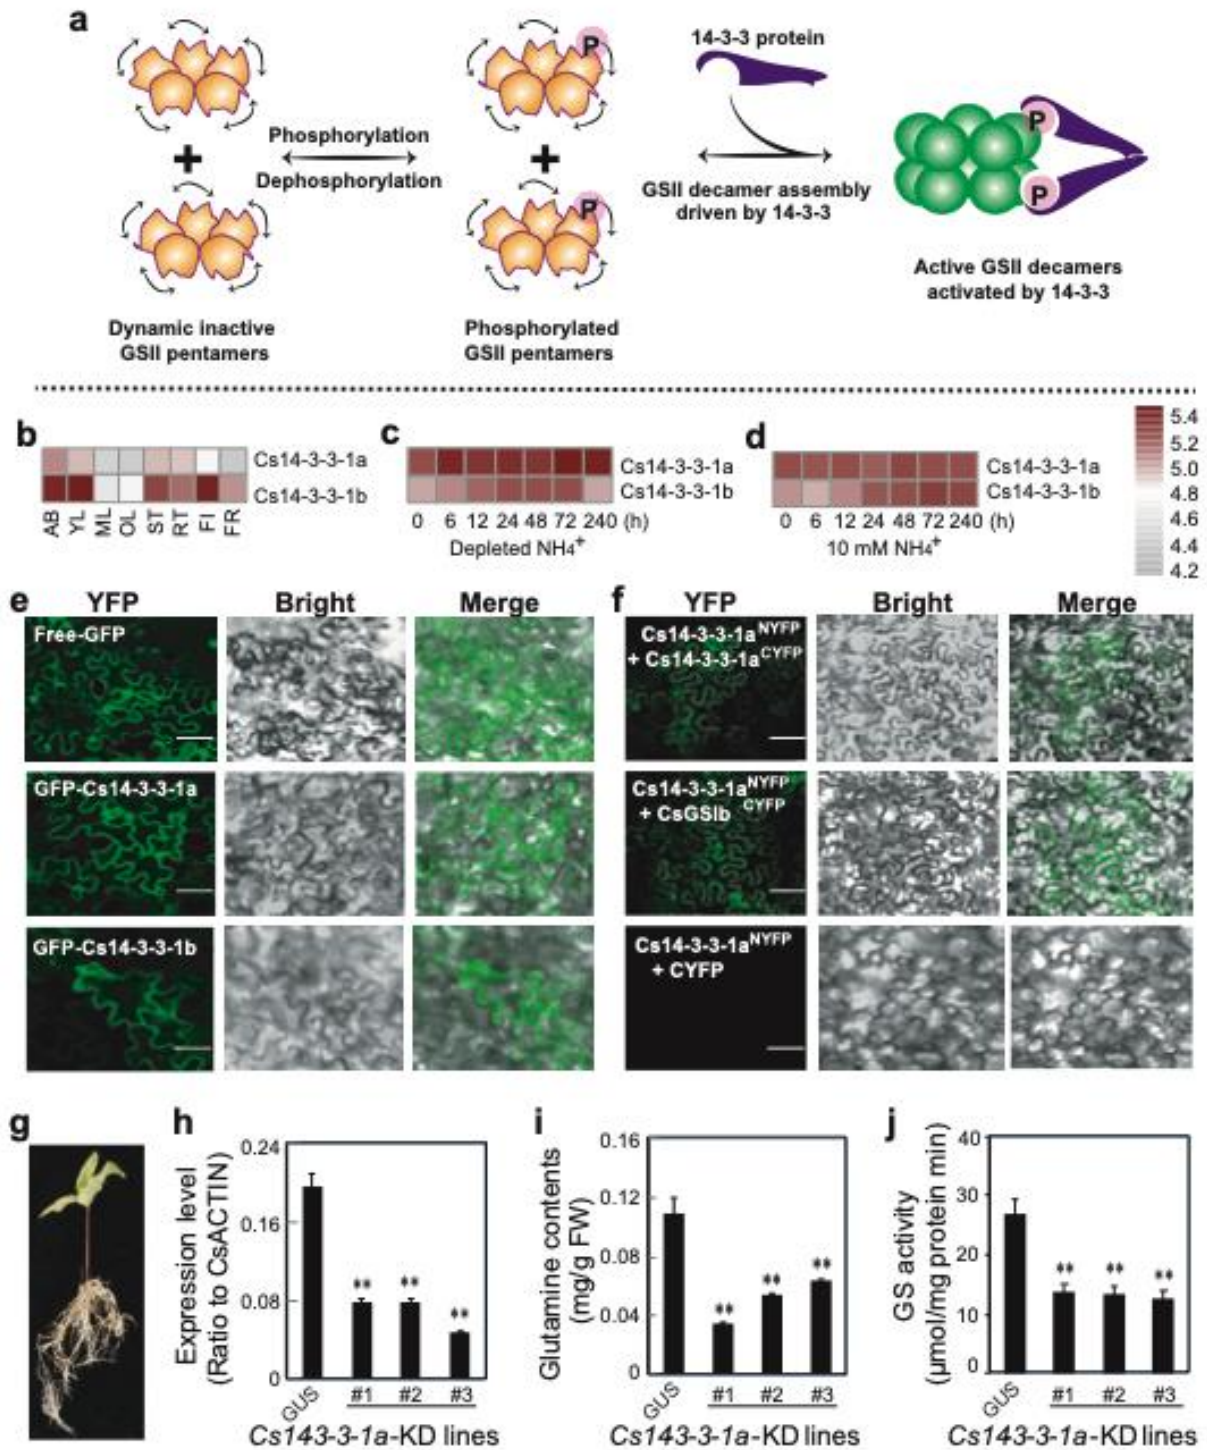

697

698 **Fig. 5: Activation of the CsGSIIb by the 14-3-3 scaffold protein.**

699 **a**, Proposed working model of how 14-3-3 protein modulates the activity of GSIIIs. P in  
700 pink sphere denotes the post-translational modification of phosphorylation. **b**,  
701 Expression patterns of *Cs14-3-3-1a* and *Cs14-3-3-1b* genes in various tea plant tissues.  
702 **c**, Induction of *Cs14-3-3-1a* and *Cs14-3-3-1b* genes by depletion of  $\text{NH}_4^+$  from culture  
703 medium. **d**, Expression of *Cs14-3-3-1a* and *Cs14-3-3-1b* genes in tea plant roots fed  
704 with 10 mM  $\text{NH}_4^+$ . AB, apical buds of unopened leaves at the top of actively growing  
705 shoots; YL, first and second young leaves below the apical buds; ML, mature leaves  
706 geminated in the spring and harvested in the autumn; OL, old leaves at the bottom of  
707 tea tree plant; FL, flowers; FR, fruits of tea plants; ST, stem tissues at the 2nd and 3rd  
708 internodes; RT, roots. **e**. Subcellular localization of *Cs14-3-3-1a* and *Cs14-3-3-1a* fusion  
709 proteins in tobacco leaf epidermal cells. bar = 50  $\mu\text{M}$ . **f**. BIFC assay of interaction  
710 among *Cs14-3-3-1a*, *Cs14-3-3-1b* and *CsGSIIb* in tobacco leaf cells. bar = 50  $\mu\text{M}$ . **g**,  
711 Generation of tea plant transgenic hairy roots with RNAi knockdown(KD) of *Cs14-3-3-1a*  
712 gene. **h**, Expression of *Cs14-3-3-1a* in at least three tea plant transgenic hairy roots of  
713 *Cs14-3-3-1a-KD* compared with *GUS* roots. **i**, Glutamine contents in three tea plant  
714 transgenic hairy roots of *Cs14-3-3-1a-KD* compared with *GUS* roots. **j**, GS activity in  
715 three tea plant transgenic hairy roots of *Cs14-3-3-1a-KD* compared with *GUS* roots. All  
716 experiments were conducted at least three 3 independent experiments. At least 5  
717 transgenic hairy roots for *Cs14-3-3-1a* and *GUS* genes were examined. Data are  
718 expressed as means  $\pm$  s.d. Differences in two-tailed comparisons between transgenic  
719 lines and *GUS* controls were analyzed, \*\*p < 0.01 in student's t-test. See Methods for  
720 experimental details.  
721

722

723

724

725

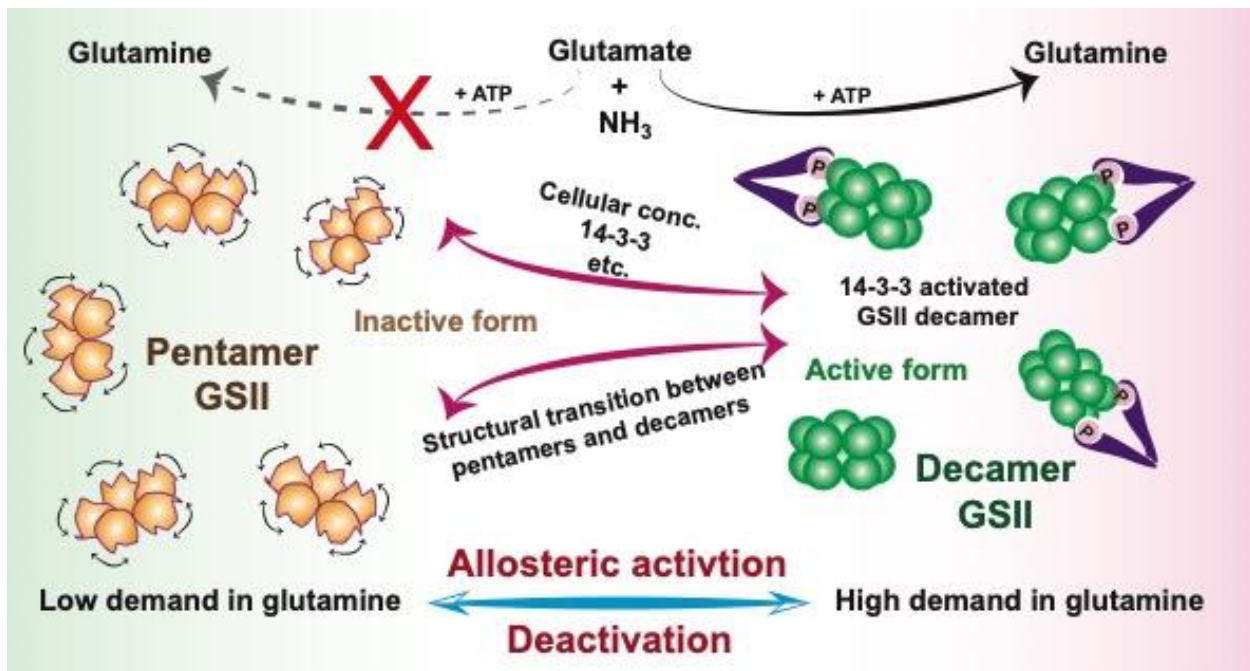

726

727 **Fig. 6: Schematic model of how activity of GSII is allosterically regulated in cells**  
728 **to meet metabolic needs.**

729 In low demand of glutamine, GSII is kept in the dephosphorylated state and exists as  
730 isolated inactive pentamers (orange); In the physiological context of high demand of  
731 glutamine, phosphorylation and subsequent binding to 14-3-3 (or by increase in cellular  
732 concentration) trigger a rapid transition of quaternary assembly of GSII from the  
733 pentamer to decamer (green), which, via the mechanism of dynamics-driven allostery,  
734 activates GSII.

735

736

737

738

739

740

741

742

743

## Supplementary Data & Figures

744

### ***Camellia sinensis* CsGS1b exhibits a pentamer-decamer dynamic equilibrium in solution**

745

746

747

748

749

750

751

752

753

754

755

756

To further characterize the low propensity of CsGS1b for decamer forming, we carried out SEC-MALS measurements at various concentrations. As shown in Fig. S1a, increase in the concentration of CsGS1b sample injected favored association of pentamers towards formation of decamer, and vice versa, suggesting a dynamic nature of the interaction between two pentameric rings. Moreover, a series of SEC-MALS measurements of CsGS1b at different salt concentrations were performed to decipher the driving force mediating the inter-ring contact. While addition of salt of NaCl in the regime of low salt concentrations (from 0 to 300 mM) provoked the dissociation of decamer into pentamers first, further increase in salt concentration (from 300 to 500 mM) tended to facilitate re-association of pentameric subcomplexes to some extent (Fig. S1b), suggesting a mixture of electrostatic and hydrophobic interactions is responsible for attaching of two pentameric rings.

757

758

759

760

761

To probe the effects of various ligands on the stability of CsGS1b, a series of fluorescent dye-monitored thermal shift assays were carried out as described previously<sup>13</sup>. As shown in Fig. S1c, addition of magnesium ions or its combination with the nonhydrolyzable ATP analog AMPPNP resulted in increases in the melting temperature ( $T_m$ ) of CsGS1b with ~6 or ~10 °C, respectively, while the presence of the substrate of

762 glutamate showed no apparent effect on  $T_m$ , consistent with previous observations<sup>13</sup>. In  
763 contrast, as evidenced by SEC-MALS measurements (Fig. S1d), the presence of the  
764 above ligands showed no appreciable effect on the decamer-forming properties. These  
765 observations collectively indicate that while binding to substrate or cofactor rigidifies the  
766 structural organization within individual pentamer rings, the inter-ring assembly of GSII  
767 is, at least in vitro, not substrate-induced.

768

769

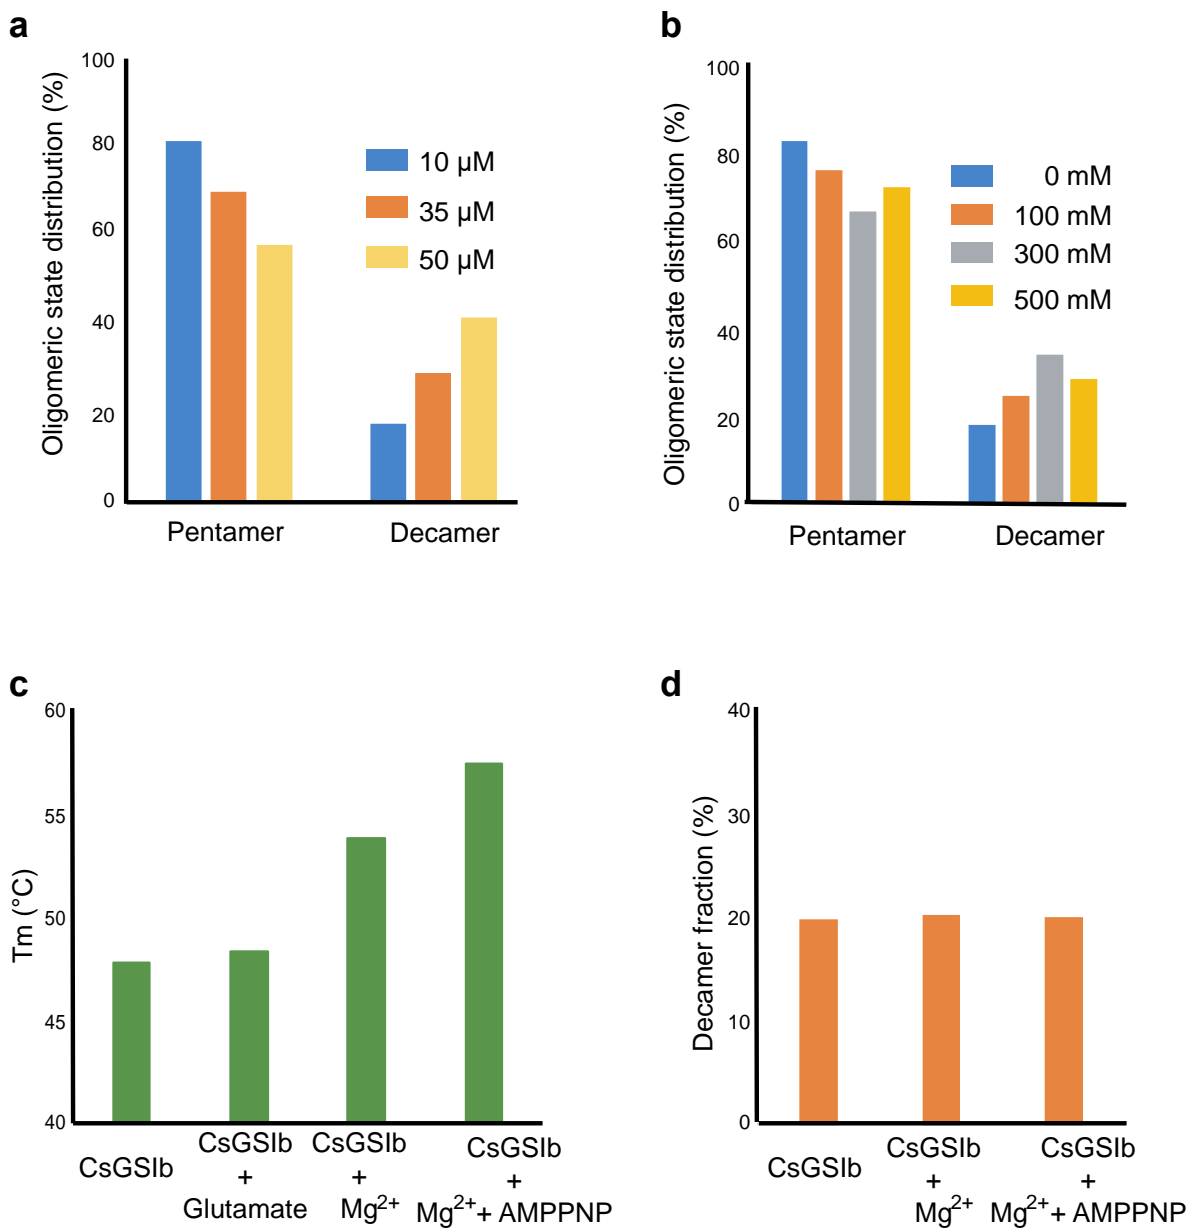

**Fig. S1: CsGslb exhibits a pentamer-decamer dynamic equilibrium in solution.**

Using SEC-MALS to reveal the dependence of CsGslb assembly status on: **a**, protein concentrations; **b**, salt concentrations. **c**, Melting temperatures of CsGslb in presence of various substrates as measured by differential scanning fluorimetry. **d**, Effects of various substrates on quaternary assembly status of CsGslb as measured by SEC-MALS.

770  
771  
772  
773  
774  
775  
776  
777

778

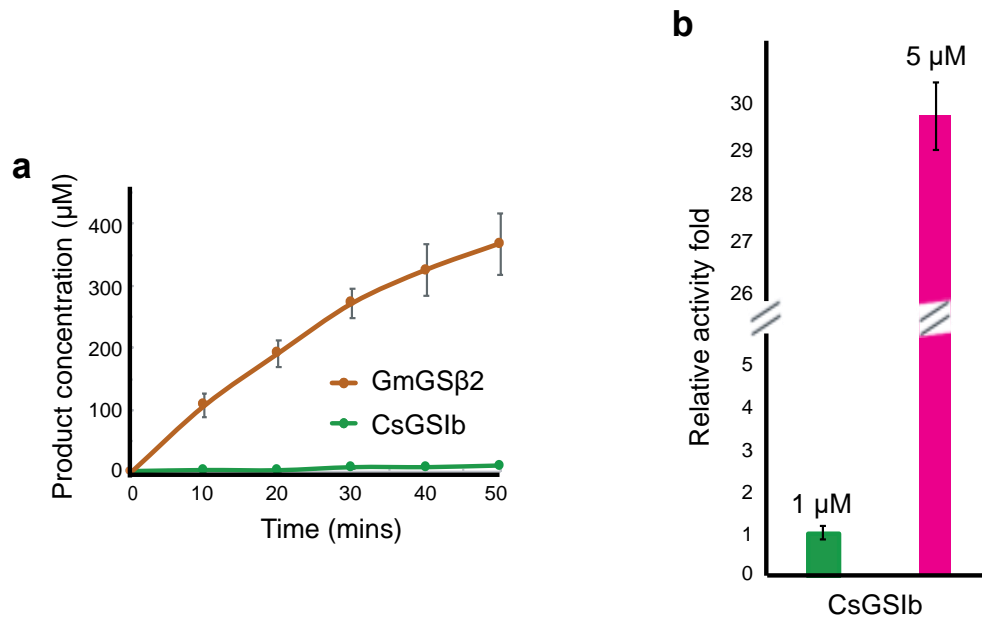

**Fig. S2: Enzymatic characterization of GmGSβ2 and CsGS1b.**

**a**, Time courses of GS activity for GmGSβ2 (orange) and CsGS1b (green). **b**, GS activity of CsGS1b demonstrates significant concentration-dependence. Green bar: 1 μM enzyme; Pink bar: 5 μM enzyme, Enzyme concentrations are shown as monomer concentration. Reaction conditions are same as that in **Fig. 2**. All experiments were repeated three times and data are shown as means ± s.d.

779

780

781

782

783

784

785

786

787

788

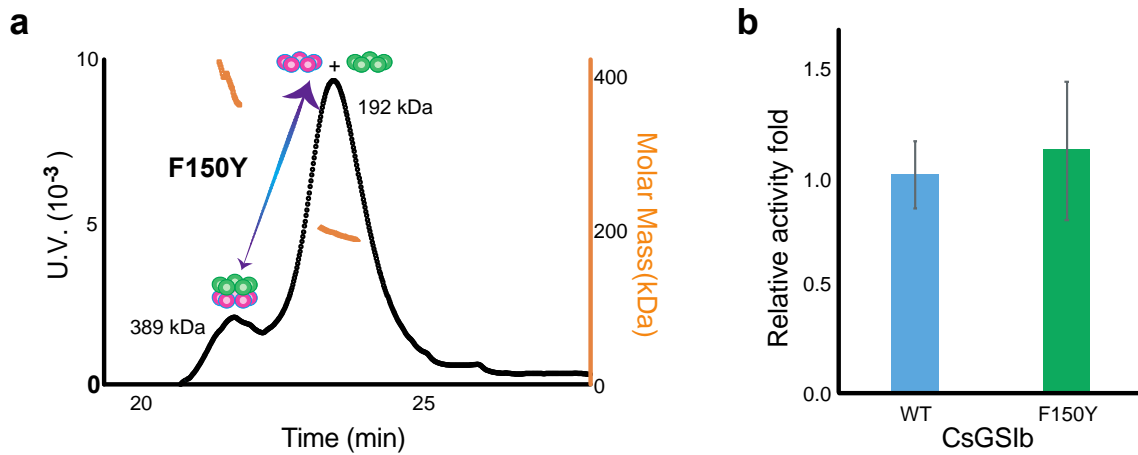

**Fig. S3: Mutation effects of F150Y on the quaternary assembly property and enzyme activity of CsGslb.**

**a**, SEC-MALS profile of CsGslb F150Y mutant reveals no change in the quaternary assembly property upon mutation. **b**, Wild type CsGslb and F150Y demonstrate similar GS activities. Activity assays were performed three times in the condition same as that in **Fig.2**. Data are shown as means  $\pm$  s.d.

789

790

791

792

793

794

795

796

797

798

799

800

801

802



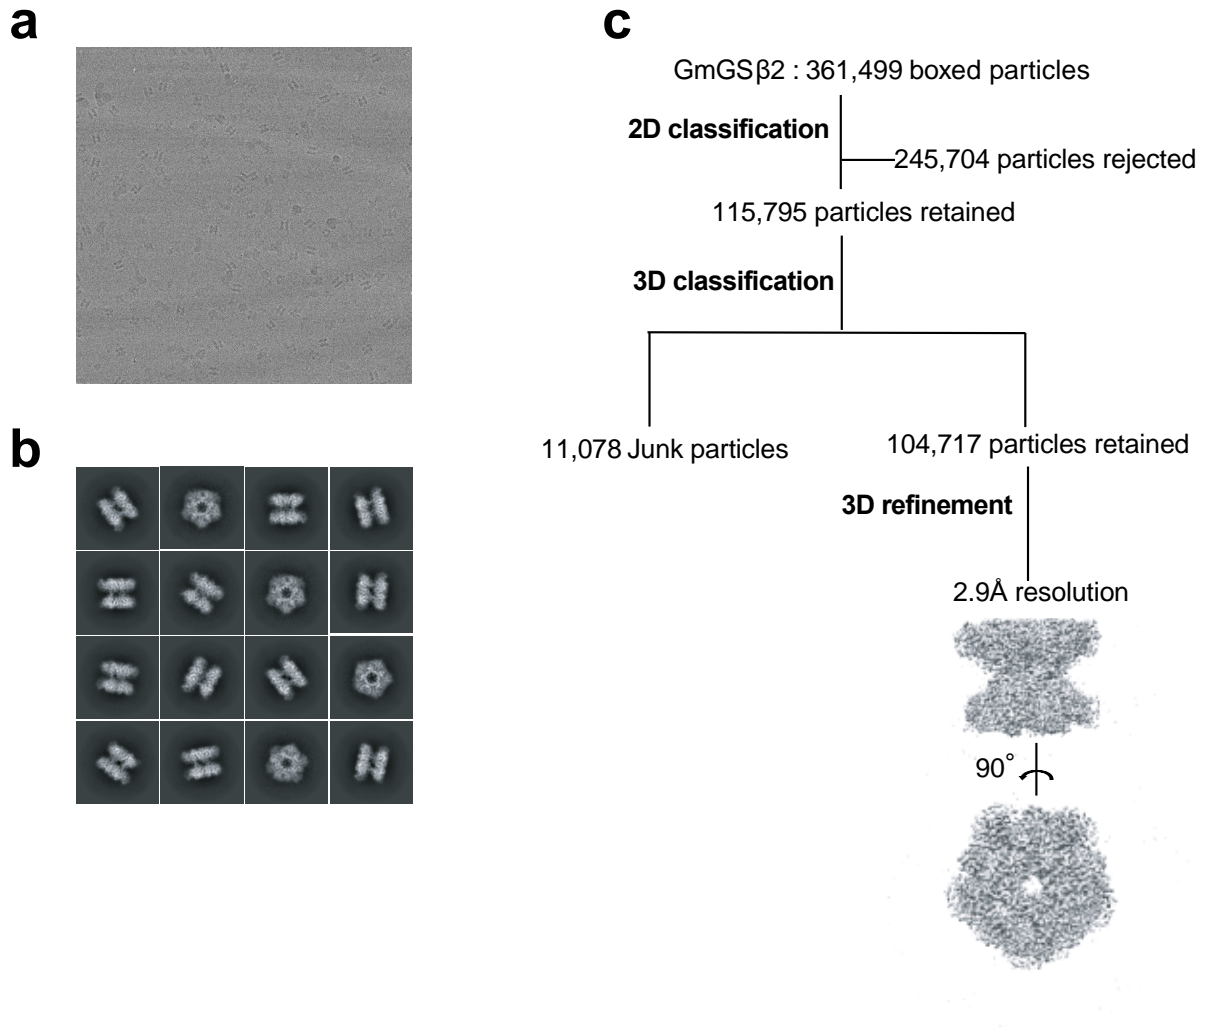

**Fig. S4: Cryo-EM analysis of GmGSβ2.**

**a**, Representative cryo-EM micrograph; **b**, Subset of representative, reference-free 2D class averages; **c**, Data processing workflow.

803

804

805

806

807

808

809

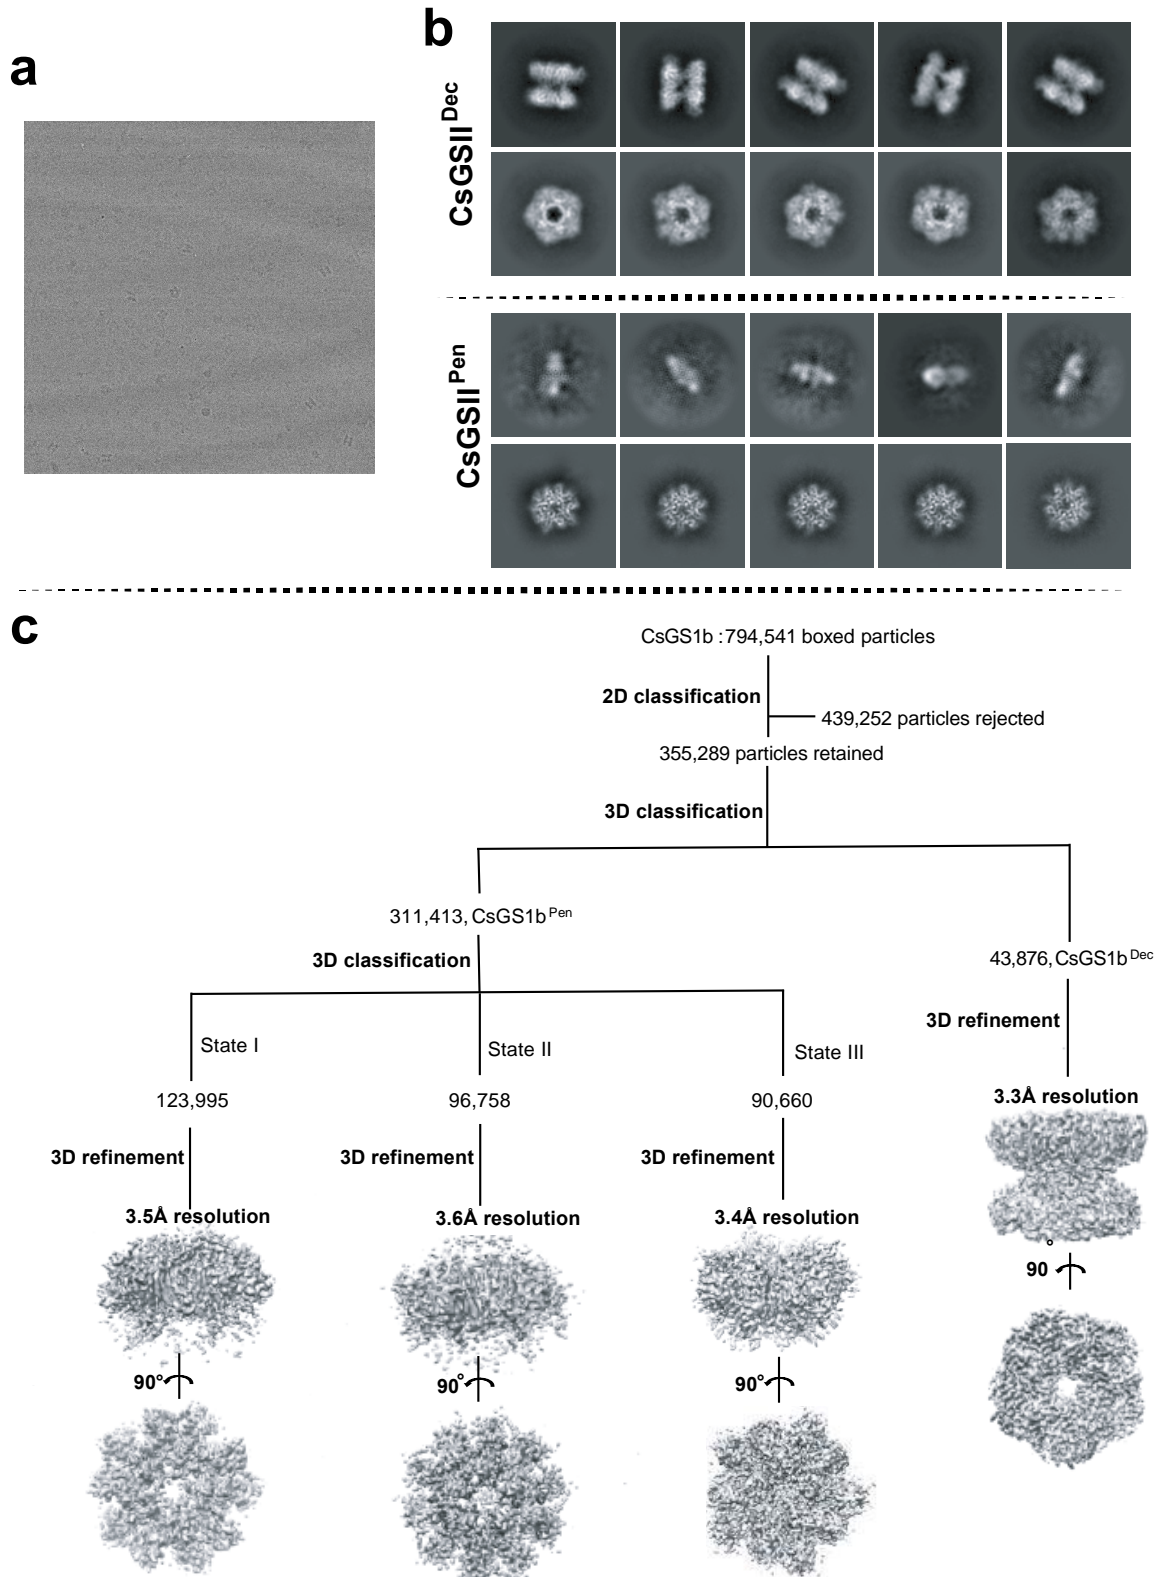

**Fig. S5: Cryo-EM analysis of CsGS1b.**

**a**, Representative cryo-EM micrograph; **b**, Subset of representative, reference-free 2D class averages; **c**, Data processing workflow.

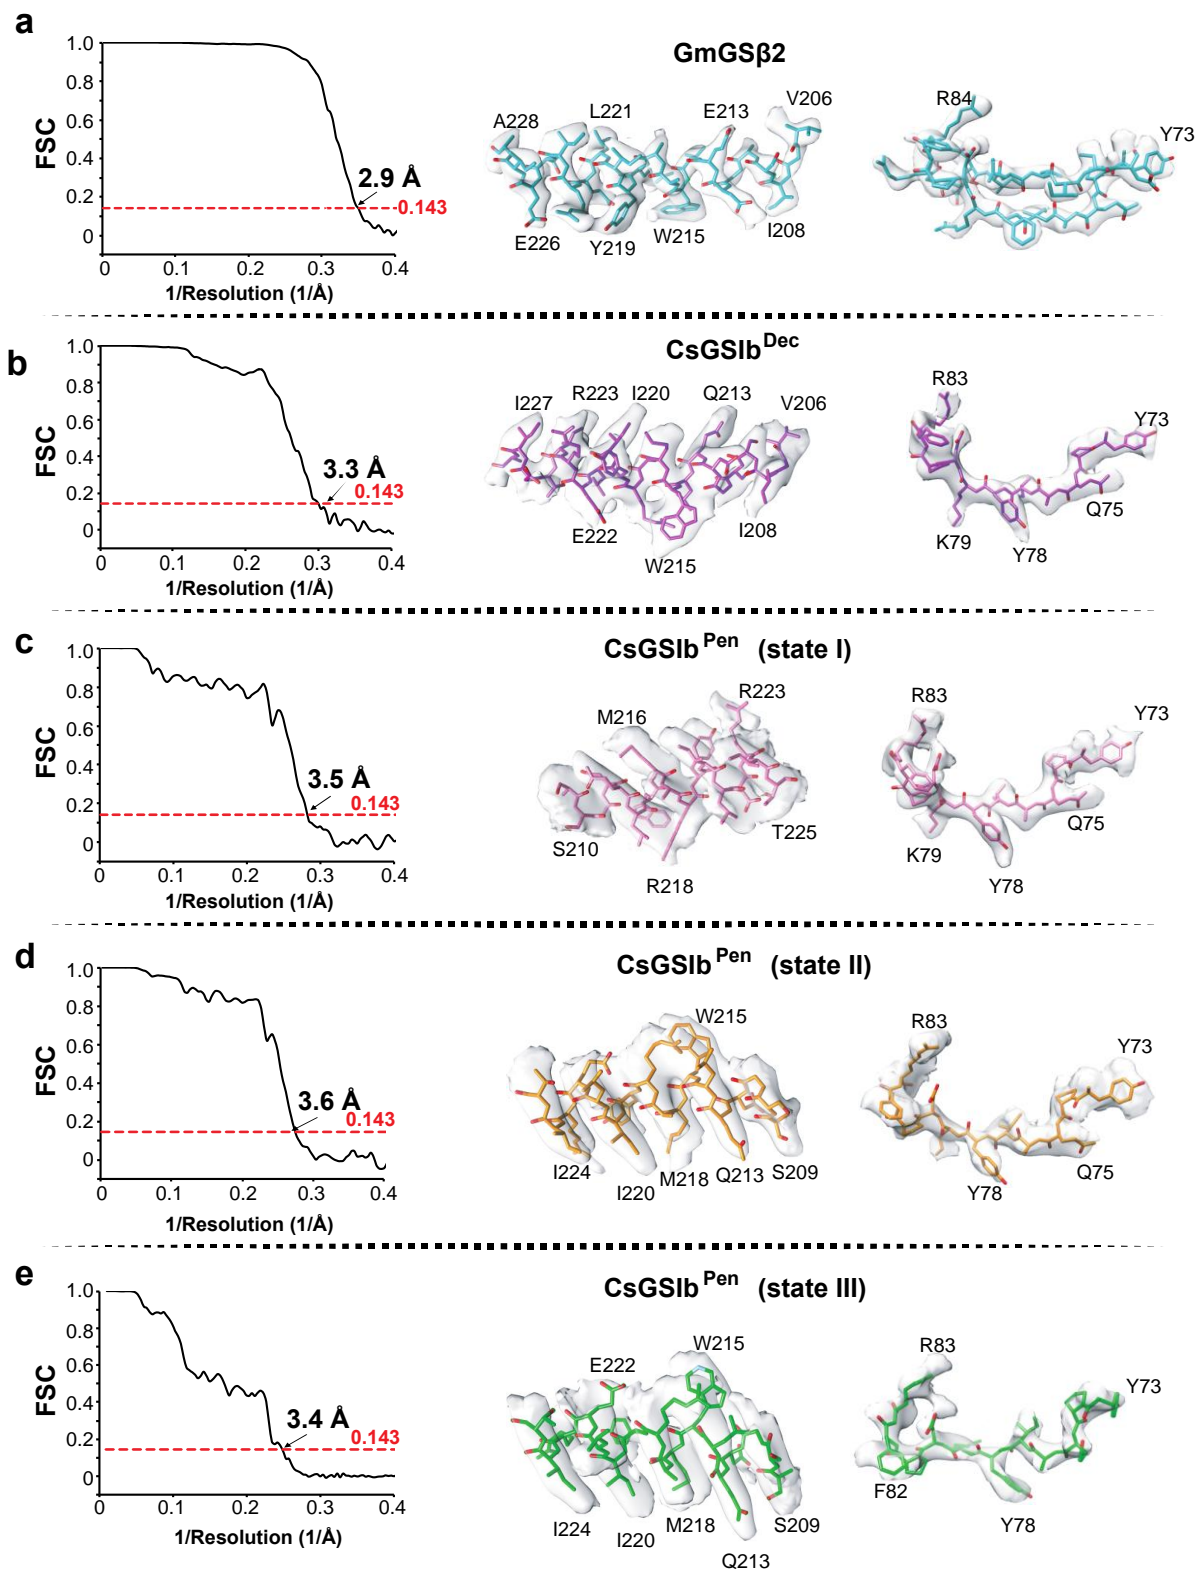

**Fig. S6: Validation of cryo-EM structures**

**a-e:** GmGS $\beta$ 2, CsGSIb<sup>Dec</sup>, and three states of CsGSIb<sup>Pen</sup>, respectively. Left: Gold-standard FSC plots generated from cryoSPARC; Right: View of model fitted in representative density.

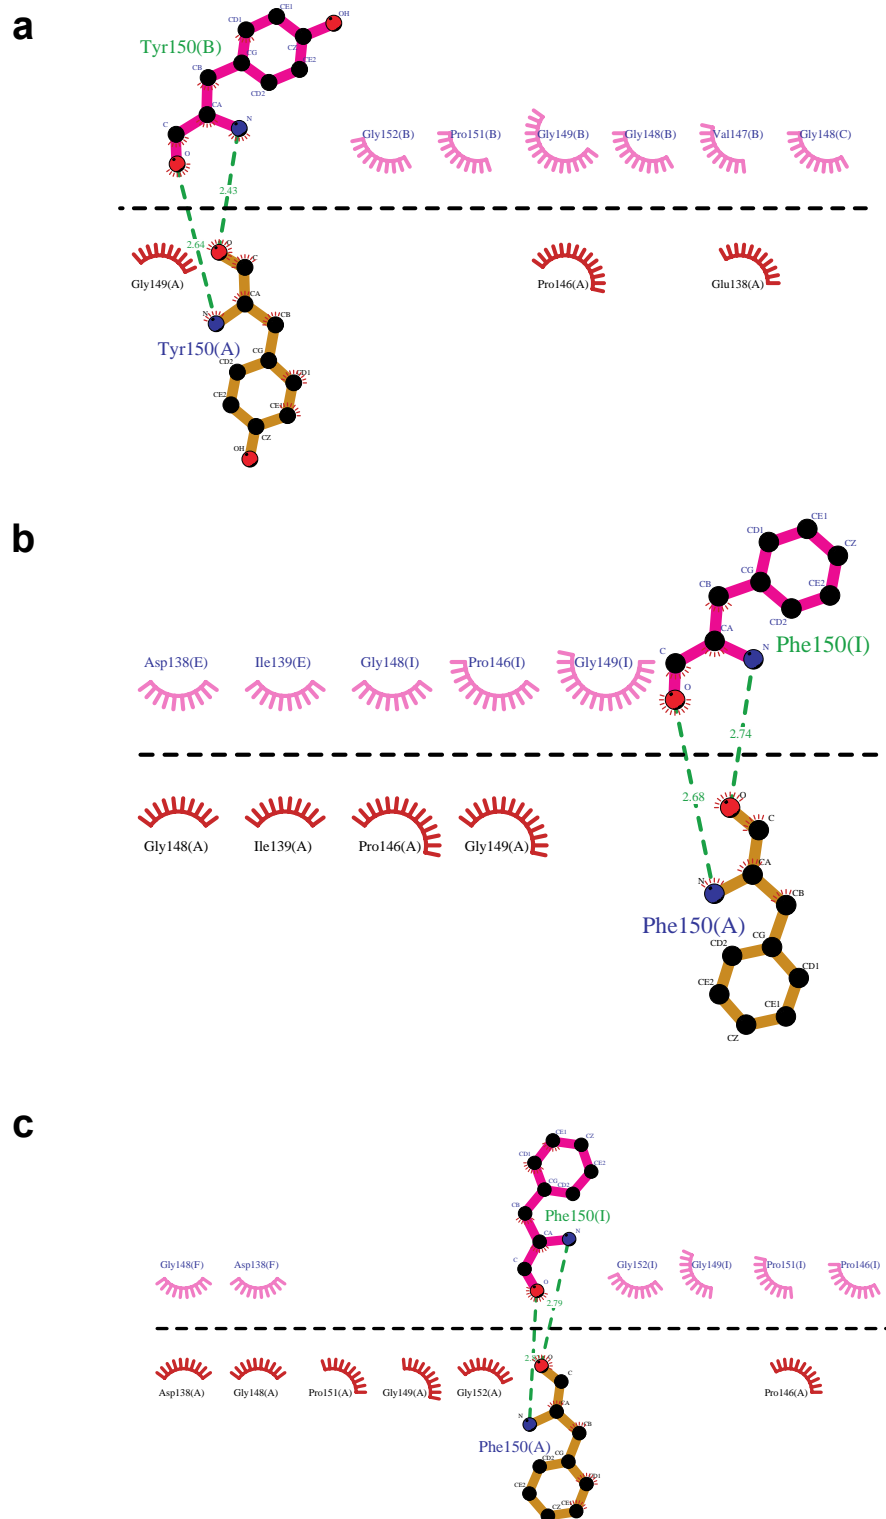

**Fig. S7: Detailed analysis of interactions between two GSII pentameric rings using the program of Ligplot.**

**a**, CsGSIIb; **b**, GmGS $\beta$ 2; and **c**, Maize GS using the pdb code of 2d3a.

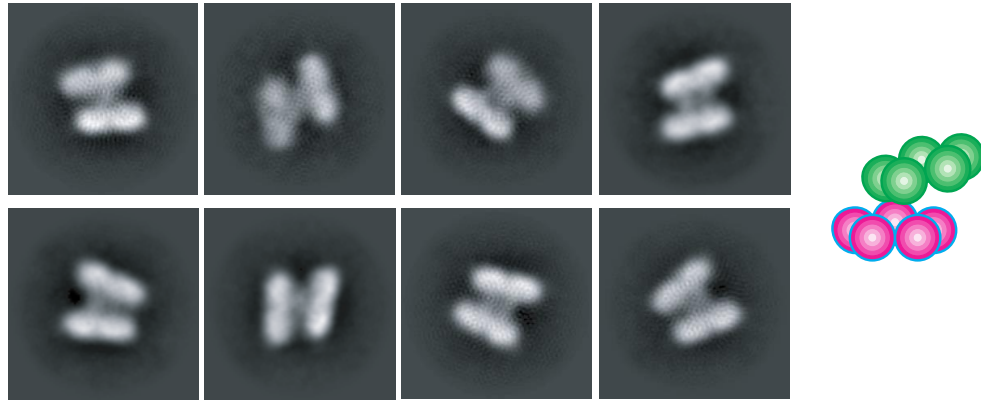

**Fig. S8: Swinging motion of CsGslb rings.** Two-dimensional class averages of CsGslb particles reveals a few class of particles in which two pentameric rings are no longer parallel. This swinging motion of the rings with respect to each other is likely to be owing to flexibility of the inter-ring connections. Right: A schematic representation of the averages is shown for clarity.

813

814

815

816

817

818

819

820

821

822

823

824

825

826

827

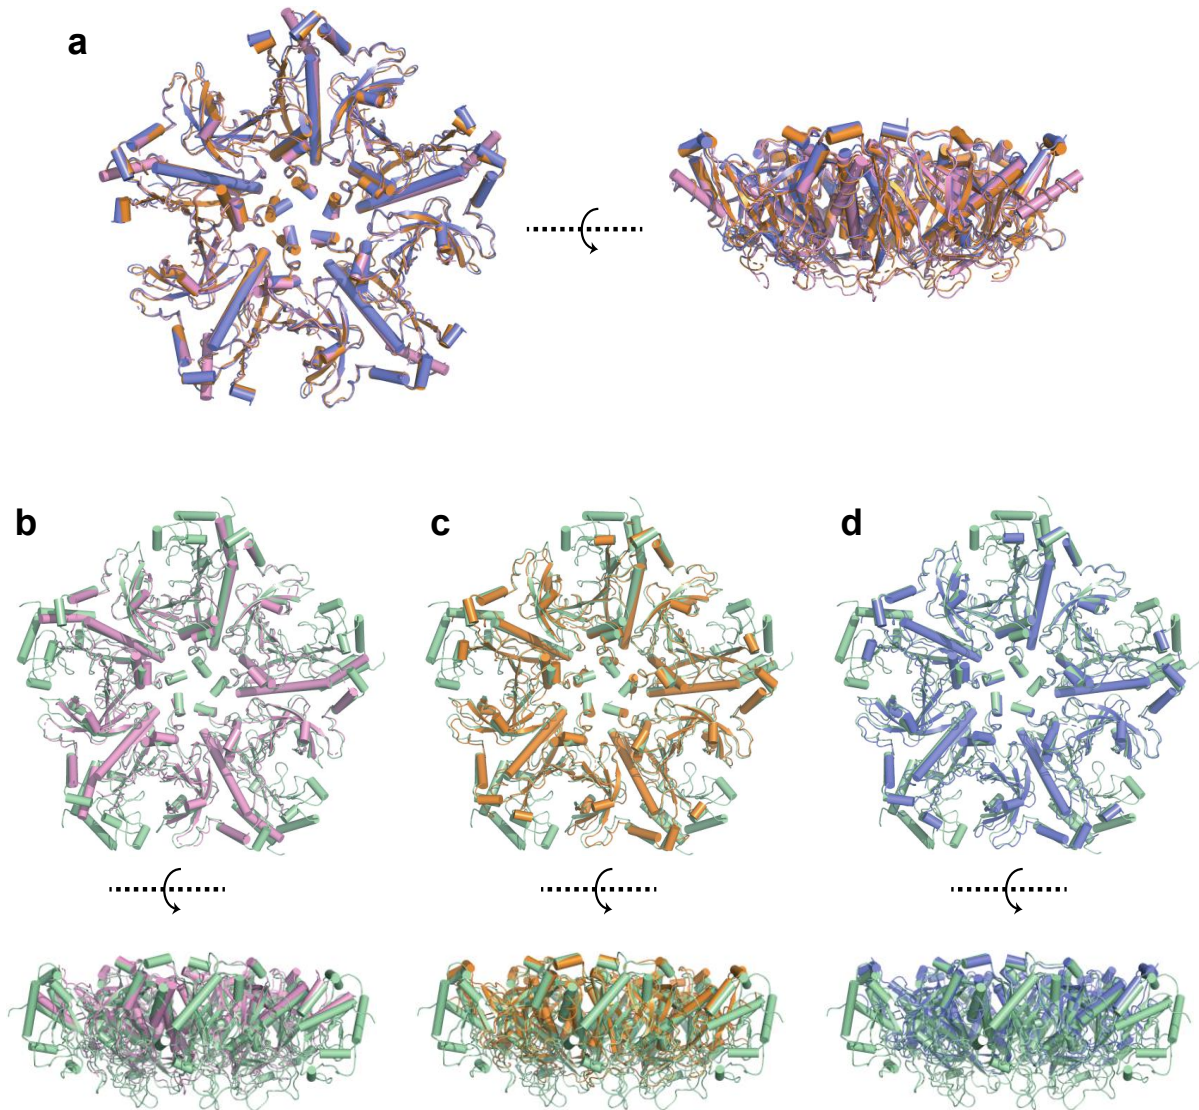

**Fig. S9: Three cryo-EM structures of CsGS1b pentamers in isolation.**

**a**, Structure alignment of three CsGS1b<sup>Pen</sup> structures determined using Cryo-EM. Left: Topview; Right: Sideview. These three structures, colored in golden, pink and purple, respectively, are highly similar to each other, with only a few structural variations at the peripheral regions. **b-d**, Structure comparison of three structures of CsGS1b pentamer in isolation (colored the same as in **a**) with that in the context of decamer (in color of green). Upper: Topview; Lower: Sideview. Note a large portion is missing in the structure of CsGS1b<sup>Pen</sup> arising from electron density missing, indicating those regions are highly dynamic.

828

829

830

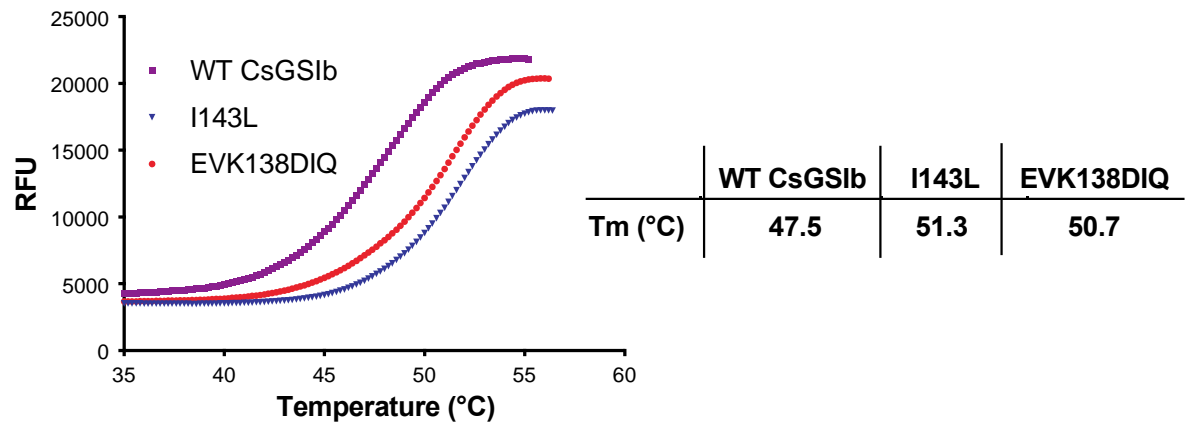

**Fig. S10 Thermal shift assays for CsGSIIb and mutants.**

The thermal stabilities of wild type CsGSII and mutants were analysed by measuring SYPRO Orange dye fluorescence over a temperature ranging from 35 to ~55 °C using a real-time PCR thermocycler. Left: Representative unfolding curves; Right: Derived melting temperatures. RFU: Relative fluorescence unit. The lower value of melting temperature for WT CsGSIIb indicates structural instability for the wild type CsGSIIb.

831

832

833

834

835

836

837

838

839

840

841

842

843

844

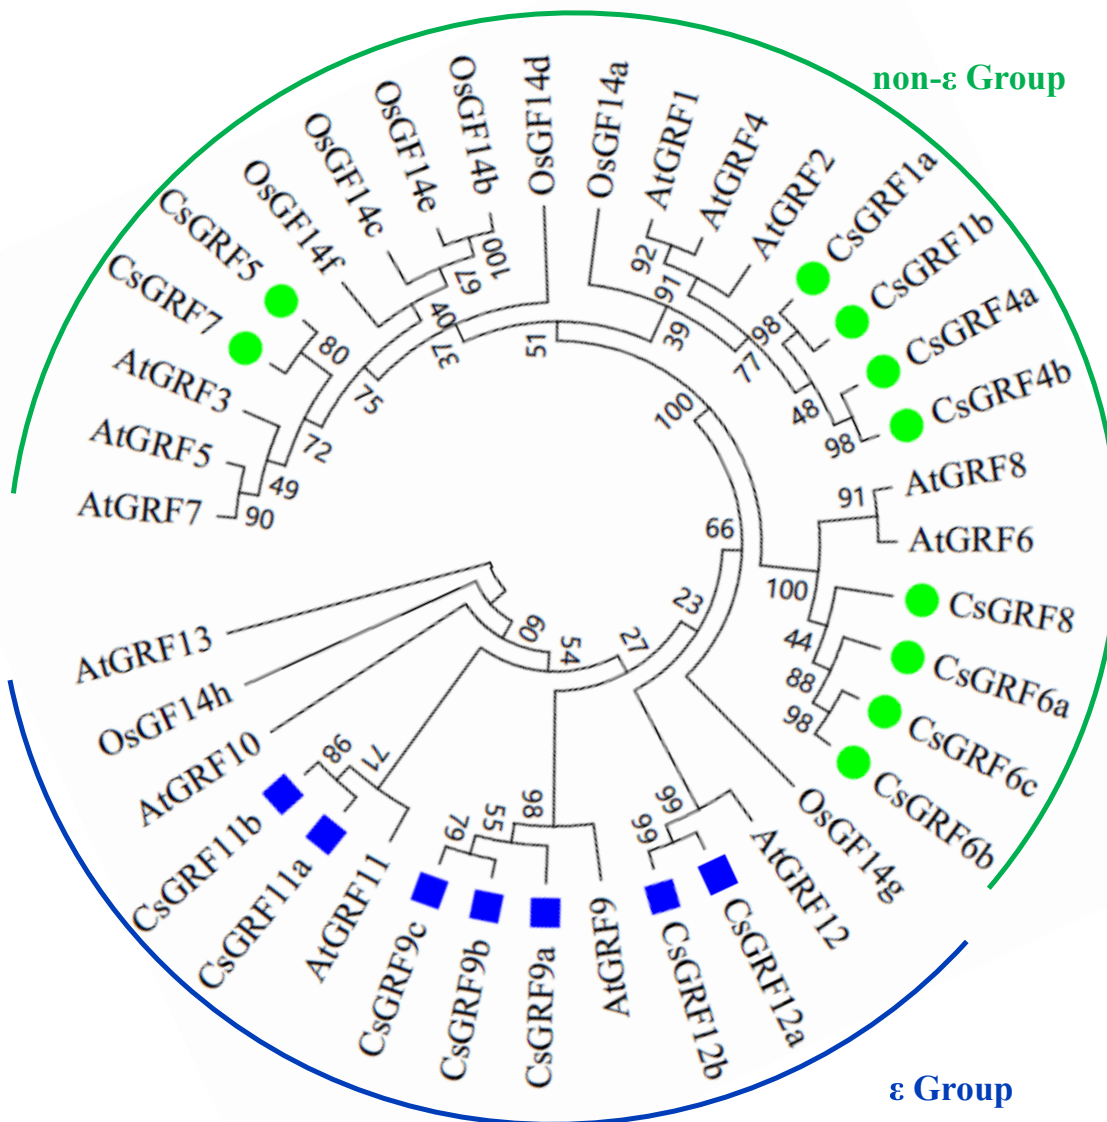

**Fig. S11.** Phylogenetic analysis of Cs14-3-3s from *Camellia sinensis* genome as compared with 14-3-3s from *Arabidopsis* and rice. Amino acid sequences were aligned by Clustal W. MEGA 6.0 software was used to construct the phylogenetic tree by the NJ method with 1000 bootstrap replicates. They are divided into two groups of non-ε Group and ε Group.

845

846

847

848



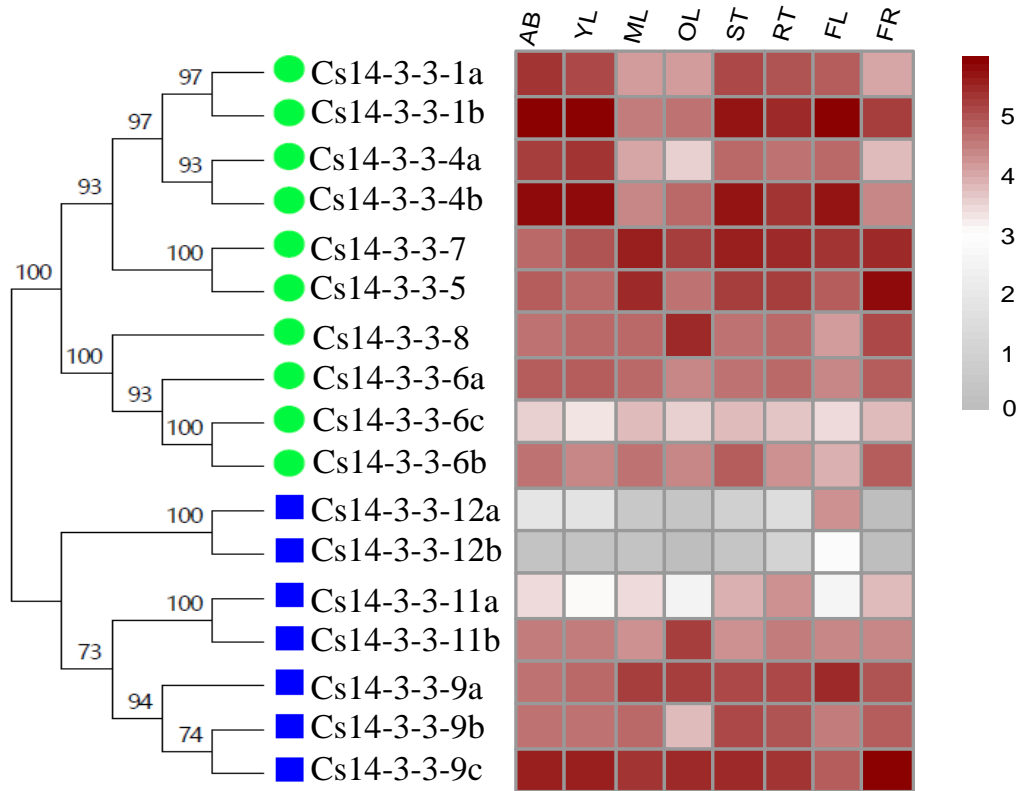

**Fig. S12.** Expression of *Cs14-3-3* genes in eight tissues of *Camellia sinensis* plants., including AB, apical bud refers to unopened leaves on the top of activity growing shoots; YL, young leaf includes the first and second leaf below the apical bud; ML, mature leaf is for these geminated in the spring and are harvested in the autumn; OL, old leaf for these in the bottom of tea tree plant; FL, Flower; FR, fruit of tea plants, ST, Stem for the 2nd, 3rd internodes; RT, roots, were retrived from RNA Sequencing data. Expression levels were calculated using Log10 (FPKM).

849

850

851

852

853

854

855

856

857 **Table S1 Cryo-EM data collection, refinement, and validation statistics.**

858

|                                                            | CsGS1b <sup>Dec</sup><br>(PDB 7V4I) | CsGS1b <sup>Pen</sup> (I)<br>(PDB 7V4J) | CsGS1b <sup>Pen</sup> (II)<br>(PDB 7V4K) | CsGS1b <sup>Pen</sup> (III)<br>(PDB 7V4L) | GmGSβ2<br>(PDB 7V4H) |
|------------------------------------------------------------|-------------------------------------|-----------------------------------------|------------------------------------------|-------------------------------------------|----------------------|
| <b>Data collection</b>                                     |                                     |                                         |                                          |                                           |                      |
| <b>Magnification</b>                                       | 29000 x                             | 29000 x                                 | 29000 x                                  | 29000 x                                   | 29000 x              |
| <b>Voltage (kV)</b>                                        | 300                                 | 300                                     | 300                                      | 300                                       | 300                  |
| <b>Electron exposure<br/>(e<sup>-</sup>/Å<sup>2</sup>)</b> | 51                                  | 51                                      | 51                                       | 51                                        | 51                   |
| <b>Defocus range (μm)</b>                                  | -1.6 ~ -2.3                         | -1.6 ~ -2.3                             | -1.6 ~ -2.3                              | -1.6 ~ -2.3                               | -1.6 ~ -2.3          |
| <b>Pixel size (Å)</b>                                      | 0.505                               | 0.505                                   | 0.505                                    | 0.505                                     | 0.505                |
| <b>Reconstruction and Model composition</b>                |                                     |                                         |                                          |                                           |                      |
| <b>Symmetry imposed</b>                                    | D5                                  | C5                                      | C5                                       | C5                                        | D5                   |
| <b>Chains</b>                                              | 10                                  | 5                                       | 5                                        | 5                                         | 10                   |
| <b>Nonhydrogen atoms</b>                                   | 27680                               | 9850                                    | 9260                                     | 8966                                      | 27340                |
| <b>Protein residues</b>                                    | 3560                                | 1275                                    | 1195                                     | 1140                                      | 3520                 |
| <b>Refinement</b>                                          |                                     |                                         |                                          |                                           |                      |
| R.m.s. deviations                                          |                                     |                                         |                                          |                                           |                      |
| <b>Bond lengths (Å)</b>                                    | 0.003                               | 0.003                                   | 0.004                                    | 0.004                                     | 0.004                |
| <b>Bond angles (°)</b>                                     | 0.585                               | 0.670                                   | 0.660                                    | 0.696                                     | 0.589                |
| <b>Model-to-map fit (CC)</b>                               | 0.74                                | 0.52                                    | 0.64                                     | 0.57                                      | 0.82                 |
| <b>Map resolution (Å)</b>                                  | 3.3                                 | 3.5                                     | 3.6                                      | 3.4                                       | 2.9                  |
| <b>FSC threshold</b>                                       | 0.143                               | 0.143                                   | 0.143                                    | 0.143                                     | 0.143                |
| <b>Validation</b>                                          |                                     |                                         |                                          |                                           |                      |
| <b>MolProbity score</b>                                    | 1.91                                | 2.28                                    | 1.98                                     | 2.24                                      | 1.63                 |
| <b>Clashscore</b>                                          | 10.27                               | 19.49                                   | 17.27                                    | 17.81                                     | 7.07                 |
| <b>Rotamers outliers (%)</b>                               | 0.00                                | 0.00                                    | 0.20                                     | 0.00                                      | 0.00                 |
| <b>Ramachandran plot</b>                                   |                                     |                                         |                                          |                                           |                      |
| <b>Favored (%)</b>                                         | 94.46                               | 91.84                                   | 96.33                                    | 91.87                                     | 96.37                |
| <b>Allowed (%)</b>                                         | 5.54                                | 8.16                                    | 3.67                                     | 8.13                                      | 3.63                 |
| <b>Outliers (%)</b>                                        | 0.00                                | 0.00                                    | 0.00                                     | 0.00                                      | 0.00                 |

859

860

861

862

863

864 **References:**

- 865 1. Marsh, J.A. et al. Protein complexes are under evolutionary selection to assemble via  
866 ordered pathways. *Cell* **153**, 461-70 (2013).
- 867 2. Goodsell, D.S. & Olson, A.J. Structural symmetry and protein function. *Annu Rev Biophys*  
868 *Biomol Struct* **29**, 105-53 (2000).
- 869 3. Levy, E.D., Boeri Erba, E., Robinson, C.V. & Teichmann, S.A. Assembly reflects evolution  
870 of protein complexes. *Nature* **453**, 1262-5 (2008).
- 871 4. Eisenberg, D., Gill, H.S., Pfluegl, G.M. & Rotstein, S.H. Structure-function relationships of  
872 glutamine synthetases. *Biochim Biophys Acta* **1477**, 122-45 (2000).
- 873 5. Stadtman, E.R., Ginsburg, A. The glutamine synthetase of *Escherichia coli*: structure and  
874 control. In: Boyer, P.D. (Ed.), *The Enzymes*, **10**, 755-807 (1974).
- 875 6. Brown, J.R., Masuchi, Y., Robb, F.T. & Doolittle, W.F. Evolutionary relationships of  
876 bacterial and archaeal glutamine synthetase genes. *J Mol Evol* **38**, 566-76 (1994).
- 877 7. van Rooyen, J.M., Abratt, V.R., Belrhali, H. & Sewell, T. Crystal structure of Type III  
878 glutamine synthetase: surprising reversal of the inter-ring interface. *Structure* **19**, 471-  
879 83 (2011).
- 880 8. Almassy, R.J., Janson, C.A., Hamlin, R., Xuong, N.H. & Eisenberg, D. Novel subunit-  
881 subunit interactions in the structure of glutamine synthetase. *Nature* **323**, 304-9 (1986).
- 882 9. Gill, H.S. & Eisenberg, D. The crystal structure of phosphinothricin in the active site of  
883 glutamine synthetase illuminates the mechanism of enzymatic inhibition. *Biochemistry*  
884 **40**, 1903-12 (2001).
- 885 10. Gill, H.S., Pfluegl, G.M. & Eisenberg, D. Multicopy crystallographic refinement of a  
886 relaxed glutamine synthetase from *Mycobacterium tuberculosis* highlights flexible loops  
887 in the enzymatic mechanism and its regulation. *Biochemistry* **41**, 9863-72 (2002).
- 888 11. Unno, H. et al. Atomic structure of plant glutamine synthetase: a key enzyme for plant  
889 productivity. *J Biol Chem* **281**, 29287-96 (2006).
- 890 12. Torreira, E. et al. The structures of cytosolic and plastid-located glutamine synthetases  
891 from *Medicago truncatula* reveal a common and dynamic architecture. *Acta Crystallogr*  
892 *D Biol Crystallogr* **70**, 981-93 (2014).
- 893 13. Krajewski, W.W. et al. Crystal structures of mammalian glutamine synthetases illustrate  
894 substrate-induced conformational changes and provide opportunities for drug and  
895 herbicide design. *J Mol Biol* **375**, 217-28 (2008).
- 896 14. Betti, M. et al. Glutamine synthetase in legumes: recent advances in enzyme structure  
897 and functional genomics. *Int J Mol Sci* **13**, 7994-8024 (2012).
- 898 15. Llorca, O. et al. The three-dimensional structure of an eukaryotic glutamine synthetase:  
899 functional implications of its oligomeric structure. *J Struct Biol* **156**, 469-79 (2006).
- 900 16. Mack, G. Glutamine synthetase isoenzymes, oligomers and subunits from hairy roots of  
901 *Beta vulgaris* L. var. *lutea*. *Planta* **205**, 113-20 (1998).
- 902 17. Armache, J.P. & Cheng, Y. Single-particle cryo-EM: beyond the resolution. *Natl Sci Rev* **6**,  
903 864-866 (2019).
- 904 18. Tzivion, G., Shen, Y.H. & Zhu, J. 14-3-3 proteins; bringing new definitions to scaffolding.  
905 *Oncogene* **20**, 6331-8 (2001).

- 906 19. Chevalier, D., Morris, E.R. & Walker, J.C. 14-3-3 and FHA domains mediate  
907 phosphoprotein interactions. *Annu Rev Plant Biol* **60**, 67-91 (2009).
- 908 20. Obsilova, V. & Obsil, T. The 14-3-3 Proteins as Important Allosteric Regulators of Protein  
909 Kinases. *Int J Mol Sci* **21**(2020).
- 910 21. Kondo, Y. et al. Cryo-EM structure of a dimeric B-Raf:14-3-3 complex reveals asymmetry  
911 in the active sites of B-Raf kinases. *Science* **366**, 109-115 (2019).
- 912 22. Finnemann, J. & Schjoerring, J.K. Post-translational regulation of cytosolic glutamine  
913 synthetase by reversible phosphorylation and 14-3-3 protein interaction. *Plant J* **24**, 171-  
914 81 (2000).
- 915 23. Pozuelo, M., MacKintosh, C., Galvan, A. & Fernandez, E. Cytosolic glutamine synthetase  
916 and not nitrate reductase from the green alga *Chlamydomonas reinhardtii* is  
917 phosphorylated and binds 14-3-3 proteins. *Planta* **212**, 264-9 (2001).
- 918 24. Lima, L., Seabra, A., Melo, P., Cullimore, J. & Carvalho, H. Phosphorylation and  
919 subsequent interaction with 14-3-3 proteins regulate plastid glutamine synthetase in  
920 *Medicago truncatula*. *Planta* **223**, 558-67 (2006).
- 921 25. Riedel, J., Tischner, R. & Mack, G. The chloroplastic glutamine synthetase (GS-2) of  
922 tobacco is phosphorylated and associated with 14-3-3 proteins inside the chloroplast.  
923 *Planta* **213**, 396-401 (2001).
- 924 26. Kerppola, T.K. Design and implementation of bimolecular fluorescence  
925 complementation (BiFC) assays for the visualization of protein interactions in living cells.  
926 *Nat Protoc* **1**, 1278-86 (2006).
- 927 27. Kuriyan, J. & Eisenberg, D. The origin of protein interactions and allostery in  
928 colocalization. *Nature* **450**, 983-90 (2007).
- 929 28. Huang, Z. et al. ASD: a comprehensive database of allosteric proteins and modulators.  
930 *Nucleic Acids Res* **39**, D663-9 (2011).
- 931 29. Red Brewer, M. et al. Mechanism for activation of mutated epidermal growth factor  
932 receptors in lung cancer. *Proc Natl Acad Sci U S A* **110**, E3595-604 (2013).
- 933 30. Capdevila, D.A., Braymer, J.J., Edmonds, K.A., Wu, H. & Giedroc, D.P. Entropy  
934 redistribution controls allostery in a metalloregulatory protein. *Proc Natl Acad Sci U S A*  
935 **114**, 4424-4429 (2017).
- 936 31. Tzeng, S.R. & Kalodimos, C.G. Dynamic activation of an allosteric regulatory protein.  
937 *Nature* **462**, 368-72 (2009).
- 938 32. Tzeng, S.R. & Kalodimos, C.G. Protein activity regulation by conformational entropy.  
939 *Nature* **488**, 236-40 (2012).
- 940 33. Veglia, G. & Cembran, A. Role of conformational entropy in the activity and regulation of  
941 the catalytic subunit of protein kinase A. *FEBS J* **280**, 5608-15 (2013).
- 942 34. Bernard, S.M. & Habash, D.Z. The importance of cytosolic glutamine synthetase in  
943 nitrogen assimilation and recycling. *New Phytol* **182**, 608-20 (2009).
- 944 35. Montanini, B. et al. Distinctive properties and expression profiles of glutamine  
945 synthetase from a plant symbiotic fungus. *Biochem J* **373**, 357-68 (2003).
- 946 36. Sakakibara, H. et al. Molecular identification and characterization of cytosolic isoforms  
947 of glutamine synthetase in maize roots. *J Biol Chem* **271**, 29561-8 (1996).
- 948 37. Seabra, A.R. & Carvalho, H.G. Glutamine synthetase in *Medicago truncatula*, unveiling  
949 new secrets of a very old enzyme. *Front Plant Sci* **6**, 578 (2015).

- 950 38. Denman, R.B. & Wedler, F.C. Association-dissociation of mammalian brain glutamine  
951 synthetase: effects of metal ions and other ligands. *Arch Biochem Biophys* **232**, 427-40  
952 (1984).
- 953 39. Mora, J. Glutamine metabolism and cycling in *Neurospora crassa*. *Microbiol Rev* **54**, 293-  
954 304 (1990).
- 955 40. Mowbray, S.L., Kathiravan, M.K., Pandey, A.A. & Odell, L.R. Inhibition of glutamine  
956 synthetase: a potential drug target in *Mycobacterium tuberculosis*. *Molecules* **19**,  
957 13161-76 (2014).
- 958 41. Thomsen, H.C., Eriksson, D., Moller, I.S. & Schjoerring, J.K. Cytosolic glutamine  
959 synthetase: a target for improvement of crop nitrogen use efficiency? *Trends Plant Sci*  
960 **19**, 656-63 (2014).
- 961 42. Harth, G. & Horwitz, M.A. Inhibition of *Mycobacterium tuberculosis* glutamine  
962 synthetase as a novel antibiotic strategy against tuberculosis: demonstration of efficacy  
963 in vivo. *Infect Immun* **71**, 456-64 (2003).
- 964 43. Gising, J. et al. Trisubstituted imidazoles as *Mycobacterium tuberculosis* glutamine  
965 synthetase inhibitors. *J Med Chem* **55**, 2894-8 (2012).
- 966 44. Kumari, M. & Subbarao, N. Virtual screening to identify novel potential inhibitors for  
967 Glutamine synthetase of *Mycobacterium tuberculosis*. *J Biomol Struct Dyn* **38**, 5062-  
968 5080 (2020).
- 969 45. Gawronski, J.D. & Benson, D.R. Microtiter assay for glutamine synthetase biosynthetic  
970 activity using inorganic phosphate detection. *Anal Biochem* **327**, 114-8 (2004).
- 971 46. Masalkar, P.D. & Roberts, D.M. Glutamine synthetase isoforms in nitrogen-fixing  
972 soybean nodules: distinct oligomeric structures and thiol-based regulation. *FEBS Lett*  
973 **589**, 215-21 (2015).
- 974 47. Punjani, A., Rubinstein, J.L., Fleet, D.J. & Brubaker, M.A. cryoSPARC: algorithms for rapid  
975 unsupervised cryo-EM structure determination. *Nat Methods* **14**, 290-296 (2017).
- 976 48. Yang, J. & Zhang, Y. I-TASSER server: new development for protein structure and  
977 function predictions. *Nucleic Acids Res* **43**, W174-81 (2015).
- 978 49. Pettersen, E.F. et al. UCSF Chimera--a visualization system for exploratory research and  
979 analysis. *J Comput Chem* **25**, 1605-12 (2004).
- 980 50. Emsley, P., Lohkamp, B., Scott, W.G. & Cowtan, K. Features and development of Coot.  
981 *Acta Crystallogr D Biol Crystallogr* **66**, 486-501 (2010).
- 982 51. Afonine, P.V. et al. Real-space refinement in PHENIX for cryo-EM and crystallography.  
983 *Acta Crystallogr D Struct Biol* **74**, 531-544 (2018).
- 984 52. Zhao, J. et al. MATE2 mediates vacuolar sequestration of flavonoid glycosides and  
985 glycoside malonates in *Medicago truncatula*. *Plant Cell* **23**, 1536-55 (2011).
- 986 53. Lu, M. et al. Significantly increased amino acid accumulation in a novel albino branch of  
987 the tea plant (*Camellia sinensis*). *Planta* **249**, 363-376 (2019).
- 988 54. Husted, S., Mattsson, M., Mollers, C., Wallbraun, M. & Schjoerring, J.K. Photorespiratory  
989 NH<sub>4</sub>(+) production in leaves of wild-type and glutamine synthetase 2 antisense oilseed  
990 rape. *Plant Physiol* **130**, 989-98 (2002).
- 991
